# Supplementary material for: Unintended pregnancy, induced abortion and abortion care-seeking experiences among adolescents in Kinshasa, Democratic Republic of Congo: a cross-sectional study
Source: PubMed Central journal article supplement — BMJ Open. 2021 Sep 2;11(9):e044682. doi: 10.1136/bmjopen-2020-044682 (PMC8413879; doi:10.1136/bmjopen-2020-044682), 2021-09-02
Supplement: bmjopen-2020-044682.draft_revisions.pdf [file bmjopen-2020-044682.draft_revisions.pdf]

# BMJ Open

BMJ Open is committed to open peer review. As part of this commitment we make the peer review history of every article we publish publicly available.

When an article is published we post the peer reviewers' comments and the authors' responses online. We also post the versions of the paper that were used during peer review. These are the versions that the peer review comments apply to.

The versions of the paper that follow are the versions that were submitted during the peer review process. They are not the versions of record or the final published versions. They should not be cited or distributed as the published version of this manuscript.

BMJ Open is an open access journal and the full, final, typeset and author-corrected version of record of the manuscript is available on our site with no access controls, subscription charges or pay-per-view fees (<http://bmjopen.bmj.com>).

If you have any questions on BMJ Open's open peer review process please email [info.bmjopen@bmj.com](mailto:info.bmjopen@bmj.com)

# BMJ Open

## Unintended pregnancy, induced abortion and abortion care-seeking experiences among adolescents in Kinshasa, Democratic Republic of Congo

|                               |                                                                                                                                                                                                                                                                                                                          |
|-------------------------------|--------------------------------------------------------------------------------------------------------------------------------------------------------------------------------------------------------------------------------------------------------------------------------------------------------------------------|
| Journal:                      | <i>BMJ Open</i>                                                                                                                                                                                                                                                                                                          |
| Manuscript ID                 | bmjopen-2020-044682                                                                                                                                                                                                                                                                                                      |
| Article Type:                 | Original research                                                                                                                                                                                                                                                                                                        |
| Date Submitted by the Author: | 23-Oct-2020                                                                                                                                                                                                                                                                                                              |
| Complete List of Authors:     | Fatusi, Adesegun; Guttmacher Institute; University of Medical Sciences Riley, Taylor; Guttmacher Institute, Kayembe, Patrick K.; University of Kinshasa , Department of Epidemiology & Biostatistics, School of Public Health Mabika, Crispin; University of Kinshasa, Department of Population Sciences and Development |
| Keywords:                     | REPRODUCTIVE MEDICINE, PUBLIC HEALTH, GYNAECOLOGY                                                                                                                                                                                                                                                                        |
|                               |                                                                                                                                                                                                                                                                                                                          |

SCHOLARONE™  
Manuscripts

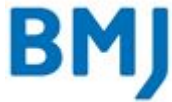

I, the Submitting Author has the right to grant and does grant on behalf of all authors of the Work (as defined in the below author licence), an exclusive licence and/or a non-exclusive licence for contributions from authors who are: i) UK Crown employees; ii) where BMJ has agreed a CC-BY licence shall apply, and/or iii) in accordance with the terms applicable for US Federal Government officers or employees acting as part of their official duties; on a worldwide, perpetual, irrevocable, royalty-free basis to BMJ Publishing Group Ltd ("BMJ") its licensees and where the relevant Journal is co-owned by BMJ to the co-owners of the Journal, to publish the Work in this journal and any other BMJ products and to exploit all rights, as set out in our [licence](#).

The Submitting Author accepts and understands that any supply made under these terms is made by BMJ to the Submitting Author unless you are acting as an employee on behalf of your employer or a postgraduate student of an affiliated institution which is paying any applicable article publishing charge ("APC") for Open Access articles. Where the Submitting Author wishes to make the Work available on an Open Access basis (and intends to pay the relevant APC), the terms of reuse of such Open Access shall be governed by a Creative Commons licence – details of these licences and which [Creative Commons](#) licence will apply to this Work are set out in our licence referred to above.

Other than as permitted in any relevant BMJ Author's Self Archiving Policies, I confirm this Work has not been accepted for publication elsewhere, is not being considered for publication elsewhere and does not duplicate material already published. I confirm all authors consent to publication of this Work and authorise the granting of this licence.

1  
2  
3 **Unintended pregnancy, induced abortion and abortion care-seeking experiences among adolescents in**  
4  
5 **Kinshasa, Democratic Republic of Congo**  
6  
7  
8  
9

10 Adesegun O. Fatusi,<sup>1,2\*</sup> Taylor Riley,<sup>1</sup> Patrick K. Kayembe,<sup>3</sup> Crispin Mabika<sup>4</sup>  
11  
12  
13

14 <sup>1</sup> Guttmacher Institute, New York, United States of America  
15

16 <sup>2</sup>University of Medical Sciences, Ondo, Ondo State, Nigeria  
17

18 <sup>3</sup> Department of Epidemiology & Biostatistics, School of Public Health, University of Kinshasa, Kinshasa,  
19 Democratic Republic of Congo  
20

21 <sup>4</sup>Department of Population Sciences and Development, University of Kinshasa, Kinshasa, Democratic  
22 Republic of Congo  
23  
24  
25  
26  
27

28 **\*Corresponding Author:**  
29

30 Adesegun O. Fatusi  
31

32 [adesegunfatusi@gmail.com](mailto:adesegunfatusi@gmail.com)  
33  
34  
35  
36  
37  
38  
39  
40  
41  
42  
43  
44  
45  
46  
47  
48  
49  
50  
51  
52  
53  
54  
55  
56  
57  
58  
59  
60

## Abstract

**Introduction:** The Democratic Republic of Congo (DRC), until recently, has a restrictive penal code that forbade abortion under any circumstances and abortion remains largely clandestine to date. To address the evidence gap regarding induced abortion among adolescents in Kinshasa, the capital of DRC, we estimated unintended pregnancy and abortion incidence for adolescents (15-19 years) in 2016 and compared with older women (20-49 years). We also compared the abortion care experiences of adolescents and older women.

**Methods:** We used the age-specific variant of Abortion Incidence Complications Method to estimate abortion and unintended pregnancy, with data from three primary sources: Health Facility Survey (n=361) provided post-abortion care (PAC) caseloads; Prospective Morbidity Survey (n=1,031) provided the age distribution and characteristics of women presenting for PAC; and, Health Professional Survey (n=115) provided an estimate of the proportion of abortions resulting in facility-based treatment of complications. Bivariate (chi-square, t-test) and multivariable (binary logistic regression, Cox proportional hazard) analyses were used to compare abortion care experiences.

**Results:** Adolescents had an estimated 27,590 induced abortions, constituting 18.8% of abortions in Kinshasa in 2016. Adolescents had the lowest abortion rate among women less than 35 years (55.2/1,000 women) but recorded the highest rate among ever sexually active women (138.4/1,000) and recently sexually active women (167.2/1,000). Also, adolescents had the highest abortion ratio (82.4/100 live births), proportion of pregnancies unintended (80%), and proportion of unintended pregnancies ending in abortion (49%). Compared to older women, adolescents had higher odds of reporting pregnancy unintendedness (AOR= 1.36, 95% C.I.=1.75-2.24), seeking abortion at later than first trimester (AOR= 1.34, 95% C.I.=1.09-1.63) and from non-medical professionals (AOR= 1.68, 95% C.I.=1.31-2.14), and not using contraceptives before pregnancy (AOR= 2.23, 95% C.I.=2.77-3.43) or post-abortion (AOR= 2.46, 95% C.I.=1.87-3.29).

**Conclusions:** Interventions are needed to reduce unintended pregnancy among adolescents in Kinshasa and improve their abortion-care experiences.

**Keywords:** Induced abortion, unintended pregnancy, abortion complications, adolescents

## Strengths and limitations of the study

- This study provides the first age-specific estimates of unintended pregnancy and abortion for Kinshasa, DRC.
- The underlying data on the number of PAC patients comes from a census of postabortion care (PAC) providing facilities in Kinshasa, and the weighted age and subgroup distribution of PAC patients is from a representative sample of PAC-providing facilities.
- In the absence of an age-specific multiplier, we uniformly applied a nationally-obtained multiplier from a representative sample of PAC cases to all the age groups to obtain the age-specific induced abortions estimates: this may bias the estimate for specific age groups.

## Key questions

### What is already known

- Kinshasa has a high level of unmet need for contraception and many women undergo abortions to meet their fertility aspirations but no age-specific data on abortion exists, and adolescent-specific abortion measures, in particular, have never been published.
- While the few studies so far published on post-abortion care in Kinshasa suggests a substantial level of abortion complications, no work has so far been published on the abortion experiences of adolescents and no comparison of adolescents' and older women's experiences have been reported.

### What are the new findings?

- We report the first adolescent-specific abortion measures for Kinshasa, DRC, using the age-specific variant of Abortion Incidence Complications Methodology (AICM): with an abortion rate of 138.4/1,000 in 2016, adolescents had the highest abortion rate among sexually active women.
- Adolescents also had the highest abortion rate among recently sexually active women (167.2/1,000), the highest abortion ratio (82.4/100 live births), the highest proportion of pregnancies unintended (80%), and the highest proportion of unintended pregnancies ending in abortion (49%).
- Compared to older women, adolescents also had less desirable abortion care experiences.

### What do the new findings imply?

- Effective policies and program are needed to reduce the high rate of unintended pregnancy among adolescents in Kinshasa, including interventions to enable them overcome various barriers to modern contraceptive services.
- Adolescent-responsive health and related social systems are needed to improve the abortion care experiences of adolescents in Kinshasa

## INTRODUCTION

Unsafe abortion is a public health challenge that is associated with at least 8% of global maternal deaths.<sup>1</sup> The burden of unsafe abortion is highest in countries with restrictive abortion laws and approximately 97% of unsafe abortions and nearly all abortion-related deaths occur in low- and middle-income countries (LMICs).<sup>2</sup> Africa, which has the highest risk of abortion-related deaths globally,<sup>2</sup> presents striking statistics: most African countries have restrictive laws<sup>3</sup> and induced abortions\* occur mostly in a clandestine manner, with the result of over three-quarters (75.6%) of the estimated annual 6.86 million abortions in Africa being unsafe.<sup>2</sup>

Democratic Republic of Congo (DRC), the third most populous country in Africa, previously had a restrictive penal code that forbade abortion under any circumstances but domesticated the African Charter on Human and People's Rights on the Rights of Women (Maputo Protocol) that permits abortion on some health grounds in 2008.<sup>4</sup> However, abortion remains largely clandestine in DRC.<sup>5</sup> With an estimated population of 12 million in 2016, Kinshasa, the capital of DRC, is the second most populous and densest city in sub-Saharan Africa.<sup>6</sup> Kinshasa has a high level of unmet need for contraception<sup>7-9</sup> and many women undergo abortions to meet their fertility aspirations.<sup>5,8,10</sup> Two studies involving different methodological approaches – the Confidante Method<sup>10</sup> and Abortion Incidence Complications Method (AICM)<sup>5</sup> similarly estimated Kinshasa's abortion rate as 55-56 per 1,000 women aged 15-49 for 2015/2016. While some small-scale studies suggest a substantial level of adolescent abortion in Kinshasa,<sup>11-13</sup> adolescent-specific abortion estimates are lacking.

---

\* While we recognize that the term "abortion" technically covers both induced abortion and spontaneous abortion (miscarriages), unless otherwise specified, abortion as used in this paper refers to induced abortion.

1  
2  
3 Globally, studies on adolescent-specific abortion measures are rare, despite indications that adolescents  
4 contribute significantly to the abortion burden and are potentially at greater risks of complications  
5 associated with lower rates of healthcare access.<sup>14,15</sup> As a 2019 review to mark the 25<sup>th</sup> anniversary of the  
6 International Conference on Population and Development notes, “Data on the specific levels and trends  
7 in abortion measures that are specific to adolescents are scarce, particularly among developing  
8 countries.”<sup>16</sup> Studies comparing abortion measures for adolescents and older women are also scarce and  
9 the findings from the few existing studies vary considerably.<sup>17</sup> In Africa, compared with older women (20-  
10 49 years), higher adolescent abortion rates have been reported for Nigeria,<sup>18</sup> but lower rates for Gabon,  
11 Ghana, Republic of Congo, and Zimbabwe.<sup>17,18</sup>

12  
13  
14  
15  
16  
17  
18  
19  
20  
21  
22  
23  
24  
25 Among African countries, recent adolescent-specific abortion estimates are only available for Ethiopia,<sup>19</sup>  
26 Uganda,<sup>20</sup> and Zimbabwe.<sup>21</sup> These recent papers, unlike previous works, adjusted for sexual activity and,  
27 therefore, provide estimates specifically for sexually active adolescents and older women, which make for  
28 a more valid comparison between the age groups. While sexually active adolescents had a higher abortion  
29 rate compared to older women in Ethiopia<sup>19</sup> and Uganda,<sup>20</sup> but the reverse was the case in Zimbabwe.<sup>21</sup>  
30 The differential findings probably reflect contextual sexual and reproductive health (SRH) dynamics and  
31 highlight the need for studies in different geographies. So far, no comparison of abortion incidence for  
32 adolescents and older women exist in the literature for Kinshasa, DRC, as age-specific estimates are  
33 lacking. Generating age-specific abortion and unintended pregnancy measures is crucial for understanding  
34 the burden of unintended pregnancy and abortion among adolescents and for advocating for relevant  
35 interventions to improve their health and wellbeing.<sup>9</sup>

36  
37  
38  
39  
40  
41  
42  
43  
44  
45  
46  
47  
48  
49  
50  
51  
52 Comparing adolescent and non-adolescent abortion-related care experiences, including post-abortion  
53 care, is also important as the experiences have significant implications for the health outcomes and well-  
54



1  
2  
3 being of the women seeking abortions, as well as for health systems treating abortion complications.  
4  
5 Some of the existing studies suggest that the quality of care and the experiences of adolescents in the  
6  
7 context of abortion may differ significantly from that of older women<sup>19,22</sup> but these findings are by no  
8  
9 means universal and vary by geographical and socio-economic contexts. So far, no published studies have  
10  
11 compared the abortion care experiences of adolescents and older women in Kinshasa, DRC. Analyzing  
12  
13 differences that may exist in the abortion-care experiences of adolescents and older women can generate  
14  
15 relevant information for appropriate interventions to address any potential adolescent-specific barriers  
16  
17 to relevant care.  
18  
19  
20  
21  
22

23 This study aims to address the existing evidence gap relating to age-specific analyses of abortion incidence  
24  
25 and abortion care experience in Kinshasa, DRC. Our primary objective is to estimate and compare  
26  
27 unintended pregnancy and abortion incidence for adolescents and older women in Kinshasa. Secondly,  
28  
29 we compare the abortion care experiences of adolescents and older post-abortion care patients.  
30  
31  
32  
33

## 34 **METHODS**

### 35 **Study Design and Data Sources**

36  
37 We used the age-specific variant of AICM<sup>19,20</sup> to indirectly estimate abortion and unintended pregnancy  
38  
39 for adolescents (15-19) and older women (20-49). Developed in the early 1990s, the AICM has been  
40  
41 used to estimate abortion incidence for 23 LMICs as of 2017.<sup>23</sup> The age-specific AICM uses three  
42  
43 primary data sources: Health Facility Survey (HFS), which provides post-abortion care (PAC) caseloads;  
44  
45 Prospective Morbidity Survey (PMS), which provides the age distribution and characteristics of women  
46  
47 presenting for PAC and their care-seeking behavior and experience; and, Health Professional Survey  
48  
49 (HPS) that provides an estimate of the proportion of abortions that results in facility-based treatment of  
50  
51  
52  
53  
54  
55  
56  
57  
58  
59  
60

1  
2  
3 abortion complications, the inverse of which serves as the multiplier or adjustment factor in the AICM  
4  
5 approach.  
6  
7  
8  
9

10 The current study is based on data collected in 2016 to estimate abortion incidence for Kinshasa. The  
11  
12 HFS was conducted in a representative sample of 361 facilities with the capacity to provide PAC. The  
13  
14 PMS was prospectively conducted for 30 days in 223 of the 361 HFS facilities with data from 1,031 PAC  
15  
16 patients. The HPS was a purposive sample of 115 health professionals who are knowledgeable about  
17  
18 abortion practices in Kinshasa. Details of the study design have previously been published by Chae and  
19  
20 colleagues.<sup>5</sup> The Institutional Review Boards of Guttmacher Institute and the University of Kinshasa,  
21  
22 School of Public Health approved the study.  
23  
24  
25  
26  
27

### 28 **Patient and public involvement**

29  
30 We did not directly involve abortion patients in the study planning but the original data collection that  
31  
32 provided the foundation for this study sought and received guidance for study planning and results  
33  
34 dissemination from a Technical Advisory Committee, which included community representatives and  
35  
36 technical experts, and the current study also received similar guidance.  
37  
38  
39  
40

### 41 **Data Analysis**

#### 42 *Abortion measures*

43  
44  
45 Our age-specific estimation of abortion incidence involved three key sequential steps. Firstly, we applied  
46  
47 the age distribution of PAC patients from the PMS to the total PAC caseloads reported by Chae et al<sup>5</sup> for  
48  
49 women age 15-49 to obtain the PAC caseloads for five-year age groups. Secondly, recognizing that PAC  
50  
51 caseloads include both induced and spontaneous abortion (miscarriages), we calculated the number of  
52  
53 treated second-trimester miscarriages through a two-step process and subtracted the obtained figure  
54  
55  
56  
57  
58  
59  
60

1  
2  
3 from the PAC caseloads. The initial step involved estimating second-trimester miscarriages requiring  
4 treatment with the assumption that only second trimester miscarriages (13-22 weeks) would result in  
5 facility-based care as is the practice in the AICM approach.<sup>23</sup> Clinical data from Harlap and colleagues  
6 show that second-trimester miscarriages constitute 2.9% of all known pregnancies and 3.41% of live  
7 births;<sup>24</sup> applying the age-specific life tables developed based on that data by Sully et al.,<sup>19</sup> we estimated  
8 the number of second-trimester miscarriages for the five-year age groups. Then, in line with previous  
9 AICM studies,<sup>23</sup> we estimated the proportion of second-trimester miscarriages that received facility care  
10 as equal to the age-specific proportion of facility-based deliveries obtained from the 2013-14  
11 Demographic and Health Survey (DHS) data for Kinshasa.<sup>25</sup> Subtracting the number of treated second-  
12 trimester miscarriages from the total age-specific PAC caseloads resulted in the age-specific PAC cases  
13 attributable to induced abortion.  
14  
15  
16  
17  
18  
19  
20  
21  
22  
23  
24  
25  
26  
27  
28  
29

30 Thirdly, we estimated abortions that did not result in facility-based care by using the multiplier, which is  
31 the inverse of the proportion of all abortions that result in complications and facility-based care as  
32 estimated in the HPS. As age-specific multipliers are not available, we applied the overall multiplier  
33 generated by Chae et al<sup>5</sup> uniformly across the age groups to estimate the number of induced abortions  
34 for each age group. We then summed the estimates obtained for all age-groups and proportionally  
35 adjusted the age-specific estimates to ensure that the sum equaled the figure previously reported by  
36 Chae et al<sup>5</sup> for women age 15-49 years.  
37  
38  
39  
40  
41  
42  
43  
44  
45  
46  
47

48 As standardly defined, we calculated the age-specific abortion incidence rate as the number  
49 of abortions per 1,000 women per age group and abortion ratio as the number of abortions per 100 live  
50 births for each age-group. To address age-related differential sexual activity we calculated abortion  
51  
52  
53  
54  
55  
56  
57  
58  
59  
60

1  
2  
3 incidence for women who ever had sex and women with recent sexual activity (defined as sex within 12  
4 months before the survey).<sup>19,20</sup>  
5  
6  
7

### 8 9 10 *Unintended pregnancy*

11 We calculated unintended pregnancy as the sum of three events: (i) induced abortion (explained above),  
12 (ii) unintended births, defined as births that were unplanned at the time of conception (either unwanted  
13 or mistimed) and obtained from the DHS, and (iii) unintended pregnancies that ended in miscarriage.  
14  
15

16 The number of unintended births was obtained by multiplying the age-specific proportion of unplanned  
17 births documented in the DHS report by the number of age-specific births, which was calculated by  
18 applying age-specific fertility rates from the 2013–14 DRC DHS<sup>25</sup> to age-specific population estimates of  
19 women of reproductive age (15-49 years) in Kinshasa.<sup>26</sup> Based on the work of Leridon and Helner<sup>27</sup> and  
20 in line with the AICM approach,<sup>23</sup>Error! Bookmark not defined. unintended pregnancies ending in miscarriage were  
21 calculated as the sum of 20% of unplanned live births and 10% of induced abortions. Intended  
22 pregnancies were calculated as the sum of planned births (obtained by subtracting unplanned births  
23 from the total number of births) and miscarriages from intended pregnancies (estimated as 20% of  
24 planned births).<sup>27</sup>  
25  
26  
27  
28  
29  
30  
31  
32  
33  
34  
35  
36  
37  
38  
39  
40

### 41 *Abortion-related experiences*

42 Using the PMS data of women receiving PAC (following either induced abortions or miscarriages), we  
43 compared the background characteristics and experiences of adolescent and older women regarding  
44 abortion. Specifically, we compared the socio-demographic and reproductive characteristics for  
45 adolescents and older women using chi-square and compared the mean number of days to reach PAC  
46 (to assess a possible delay in reaching care) using t-test. We further compared adolescents and older  
47 PAC patients using multivariable analyses for nine abortion-related and care experiences: : (i) history of  
48  
49  
50  
51  
52  
53  
54  
55  
56  
57  
58  
59  
60

1  
2  
3 previous abortion; (ii) contraception at the time of pregnancy; (iii) intendedness of index pregnancy; (iv)  
4 gestational age at abortion (first trimester versus later); (v) interference with pregnancy (inducing  
5 abortion); (vi) professional status of the abortion service provider (medical professionals versus others);  
6  
7 (vii) severity of postabortion complication (none/mild versus moderate/severe); (viii) delay in reaching  
8 care (sum of the total number of days taken to decide to seek care and to reach the first health facility);  
9  
10 and, (ix) provision of postabortion contraceptives by PAC provider. We controlled for marital status,  
11  
12 education, economic level (poor or non-poor status) based on household wealth index, previous  
13  
14 pregnancy, and pregnancy intention (except when pregnancy intendedness was the dependent variable)  
15  
16 in each multivariable model. We used binary logistic regression for multivariable analyses and obtained  
17  
18 the adjusted odds ratio (AOR) and the 95% Confidence Interval (C.I.), except in the case of the number  
19  
20 of days taken to reach PAC where we used a Cox proportional hazard model and obtained the hazard  
21  
22 ratio (HR), and 95% C.I. Analyses were undertaken using Stata version 16 and SPSS version 24.  
23  
24  
25  
26  
27  
28  
29  
30  
31

## 32 **RESULTS**

### 33 **Incidence of abortion**

34  
35 An estimated 27,590 induced abortions occurred among adolescents, constituting 18.8% of the 146,713  
36  
37 abortions in Kinshasa in 2016: this proportion is similar to the percentage of women of reproductive age  
38  
39 (15-49 years) who are adolescents (19.5%). Adolescents have the lowest abortion rate (55.2 per 1,000  
40  
41 women) among women less than 35 years of age. However, restricting the sample to only sexually active  
42  
43 women, the abortion rate shows an inverse relationship with age, and adolescents have the highest rate  
44  
45 among all women of reproductive age (Figure 1). The abortion rate is 138.4/1,000 for adolescents who  
46  
47 ever had sex and 167.2/1,000 for recently sexually active adolescents. In comparison, for older age groups,  
48  
49 the abortion rate ranges from 28.2/1,000 to 92.3/1,000 for those who ever had sex, and from 34.6/1,000  
50  
51 to 117.0/1,000 for recently sexually active women. The abortion ratio also shows an inverse relationship  
52  
53  
54  
55  
56  
57  
58  
59  
60

1  
2  
3 with age, and adolescents have the highest ratio (82.4 per 100 live births versus 33.1/100 – 56.2/100 live  
4  
5 births for older women).  
6  
7

### 8 **Unintended pregnancy**

9  
10 An estimated 70,733 pregnancies occurred among adolescents – about 12.5% of the 563,064 pregnancies  
11  
12 estimated for Kinshasa in 2016. Eighty percent of pregnancies among adolescents are unintended  
13  
14 compared to the lower range of 53%-67% for older age groups (Figure 2). The proportion of unintended  
15  
16 pregnancies that ended in abortion shows an inverse relationship with age, decreasing progressively from  
17  
18 49% for age 15-19 years to 37% for age  $\geq 35$  years. Unlike in older age groups (age 25-49 years), the  
19  
20 proportion of unintended pregnancies ending in abortion is higher than those ending in births among  
21  
22 adolescents (49% vs 39%) and other young people age 20-24 (46% versus 41%).  
23  
24  
25  
26  
27  
28

### 29 **Abortion-related experiences**

30  
31 Compared to older women aged 20-49 years, bivariate analysis shows that adolescent PAC clients were  
32  
33 significantly less likely to be in union (38% vs 63%,  $p < 0.001$ ) but significantly more likely to come from  
34  
35 poor households (48% vs. 39%,  $p < 0.001$ ) and have post-primary education (19% vs. 10%,  $p < 0.001$ ) (Table  
36  
37 1). Adolescents are less likely to use contraceptives before pregnancy (16% vs. 30%,  $p < 0.001$ ), report their  
38  
39 pregnancy as being intended (13% vs 30%,  $p < 0.001$ ), or receive post-abortion contraceptives (9% vs. 17%,  
40  
41  $p < 0.001$ ). However, adolescents were more likely to report the index pregnancy as induced (51% vs 40%,  
42  
43  $p < 0.001$ ) as well as seek abortion at a later gestation age than the first trimester (81% vs 76%,  $p = 0.001$ )  
44  
45 and from non-medical professionals (37% vs 44%,  $p = 0.001$ ). A higher proportion of adolescents compared  
46  
47 to older PAC patients also reported experiencing moderate/severe complications (68% vs 61%,  $p < 0.001$ )  
48  
49 or that the index pregnancy resulted from forced sex (9.9% vs 4.9%,  $p < 0.001$ ). Adolescents and older  
50  
51 women did not significantly differ in the time taken to reach PAC services (4.0 days vs. 4.4 days,  $p = 0.214$ )  
52  
53  
54  
55  
56  
57  
58  
59  
60

1  
2  
3 Multivariable analysis (Figure 3) shows that controlling for the effect of other factors, adolescent PAC  
4 patients have significantly higher odds of unintended pregnancy (AOR= 1.36, 95% C.I.=1.75-2.24), not  
5 using contraceptives before pregnancy (AOR= 2.23, 95% C.I.=2.77-3.43), but lower odds of history of  
6 previous abortion (AOR=0.78; 95% C.I.=0.63-0.96) compared to older PAC patients. Also, adolescent PAC  
7 patients have higher odds of seeking abortion at later gestational age (second or third trimester) (AOR=  
8 1.34, 95% C.I.=1.09-1.63) and from non-medical professionals (AOR= 1.68, 95% C.I.=1.31-2.14) and not  
9 receiving post-abortion contraceptives (AOR= 2.46, 95% C.I.=1.87-3.29). However, adolescents and older  
10 PAC patients did not significantly differ in terms of interfering with the index pregnancy (induced  
11 abortion), experiencing post-abortion complications, and the time taken to reach PAC services.  
12  
13  
14  
15  
16  
17  
18  
19  
20  
21  
22  
23  
24

## 25 DISCUSSION

26  
27 This study, to the best of our knowledge, provides the first age-specific estimates of unintended pregnancy  
28 and abortion for Kinshasa, DRC. Our results show that adolescents have the lowest abortion rate for  
29 women aged less than 35 years. However, when we considered only women who have ever had sex and  
30 thereby exposed to the possibility of pregnancy, adolescents have the highest rate of abortion among  
31 ever sexually active and recently sexually-active women, similar to the findings in Ethiopia<sup>19</sup> and Uganda<sup>20</sup>  
32 but contrary to the findings in Zimbabwe.<sup>21</sup> Compared to their peers in Zimbabwe (15.9/1,000),<sup>21</sup> Uganda  
33 (76.1/1,000),<sup>20</sup> and Ethiopia (90.7/1,000),<sup>19</sup> Error! Bookmark not defined. the abortion rate is substantially higher for  
34 recently sexually active adolescents in Kinshasa (167.2/1,000).  
35  
36  
37  
38  
39  
40  
41  
42  
43  
44  
45  
46  
47

48 Compared to older women, adolescents have a higher rate of unintended pregnancy in Kinshasa. The  
49 proportion of pregnancy that is unintended is also substantially higher for adolescents in Kinshasa (80%)  
50 compared to their counterparts in Ethiopia,<sup>19</sup> Uganda,<sup>20</sup> and Zimbabwe<sup>21</sup> where about half of all  
51 pregnancies or less are unintended – and likely contributed to the higher adolescent abortion rate in  
52  
53  
54  
55  
56  
57  
58  
59  
60

1  
2  
3 Kinshasa. Approximately half of the unintended pregnancy among adolescents in Kinshasa ended in  
4 abortion compared to less than a fifth of such pregnancies among adolescents in Uganda<sup>20</sup> and  
5 Zimbabwe.<sup>21</sup> While the proportion of unintended pregnancies ending in abortion is higher for adolescents  
6 compared to older women in Kinshasa, the proportion did not vary systematically by age in Uganda.<sup>20</sup>  
7  
8 Unintended pregnancy in Kinshasa, as our findings show, is more likely to result in abortion among  
9 adolescents and other young people (age 15-24) than in births unlike the picture in older women. The  
10 abortion ratio of 82.4 per 100 live births for adolescents in Kinshasa, which implies that approximately  
11 four abortions occur among adolescents for every five births, is substantially higher than the ratio for  
12 older women in Kinshasa and more than double the ratio of  $\leq 31.1/100$  live births for adolescents in  
13 Ethiopia<sup>19</sup> and Zimbabwe.<sup>21</sup>  
14  
15  
16  
17  
18  
19  
20  
21  
22  
23  
24  
25  
26  
27

28 The higher rate of unintended pregnancy among adolescents in Kinshasa compared to older women may  
29 likely be explained by differential contraceptive behavior. As the 2013-14 DRC DHS reports, adolescents  
30 have the lowest rate of contraceptive use among women aged less than 45 years.<sup>25</sup> Studies have also  
31 shown that adolescents in Kinshasa<sup>28</sup> and DRC as a whole<sup>29</sup> have a higher unmet need for contraceptives.  
32 Globally, adolescents have a higher level of unmet need for contraceptives as a result of demand-side  
33 barriers (contraceptive-seeking behavior), supply-side barriers (health service factors), and structural and  
34 environmental barriers such as unsupportive social norms and policies.<sup>30,31</sup> Specifically for DRC, research  
35 findings indicate that existing family planning services have gaps and inadequacies regarding adolescents'  
36 needs<sup>32</sup> and that cultural perspectives and social norms against premarital and adolescent sexual  
37 engagement are deeply rooted.<sup>33</sup> The strong social stigma associated with pre-marital or out-of-union  
38 pregnancy is likely to have also contributed significantly to the high adolescent abortion ratio in Kinshasa.  
39  
40  
41  
42  
43  
44  
45  
46  
47  
48  
49  
50  
51  
52  
53  
54  
55  
56  
57  
58  
59  
60

As a qualitative study reported, young people in Kinshasa have concerns that pre-marital pregnancy would



1  
2  
3 bring dishonor to their families and may, therefore, seek abortion clandestinely in case of unintended  
4 pregnancy.<sup>34</sup>  
5  
6  
7  
8  
9

10 It is important to emphasize that our findings relate to only Kinshasa – the national capital of DRC and a  
11 highly urbanized area, and not the entire country. The abortion estimates for DRC as a whole would likely  
12 have been much lower as most other parts of the country outside Kinshasa are far less urbanized and  
13 abortion rates are generally higher in urban settings.<sup>18</sup> Our focus on Kinshasa alone also likely explains the  
14 higher abortion estimates we obtained compared to the figures for adolescents in more nationally-  
15 oriented studies in Ethiopia,<sup>19</sup> Uganda,<sup>20</sup> and Zimbabwe.<sup>21</sup>  
16  
17  
18  
19  
20  
21  
22  
23  
24

25 Regarding abortion-related care experiences, our findings show that adolescent PAC clients less desired  
26 abortion care experiences compared to older women in terms of seeking an abortion later than the first  
27 trimester and from non-medical professionals, and are less likely to use contraceptives before pregnancy  
28 or receive post-abortion contraceptives. Although several authors have reported that adolescents may  
29 face more barriers to SRH care<sup>30,31</sup> and receive a lower quality of maternal health services,<sup>35</sup> the findings  
30 concerning PAC varied.<sup>20,21</sup> For example, while Riley et al.<sup>21</sup> reported that adolescent PAC patients are 21%  
31 more likely to experience a delay in reaching care in Zimbabwe compared to older women, Sully et al.<sup>20</sup>  
32 recorded no significant difference between adolescents and older women in this respect in Uganda. The  
33 Ugandan study also found no significant difference between adolescents and older women concerning  
34 the experience of unintended pregnancy, the gestational age of seeking an abortion, the use of non-  
35 medical professionals for abortion services, or in receiving post-abortion contraceptive services.<sup>20</sup>  
36  
37  
38  
39  
40  
41  
42  
43  
44  
45  
46  
47  
48  
49  
50  
51

52 This study has some limitations. First, in the absence of an age-specific multiplier, we used a uniform  
53 multiplier in estimating abortions by age groups: this may bias the estimate for specific age groups.  
54  
55  
56  
57  
58  
59  
60

1  
2  
3 Secondly, our findings regarding care-seeking experiences may not be generalizable to all abortion  
4 experiences as PAC caseload consists of both miscarriages and induced abortion cases, and the care-  
5 seeking behaviors may differ for the two groups. Also, women who had abortions but did not experience  
6 complications, those who failed to seek facility care for abortion complications or those who died from  
7 abortion complications are excluded from the PAC caseloads. Thus, our findings cannot be generalized  
8 for induced abortion complications. Thirdly, self-reported information from PAC patients may be liable  
9 to social desirability and other forms of response bias.  
10  
11  
12  
13  
14  
15  
16  
17  
18  
19  
20

21 Our findings imply the need to prioritize adolescent SRH issues in Kinshasa and strengthen policies and  
22 programs to enable adolescents to overcome various barriers to accessing modern contraceptives and  
23 thereby reduce unintended pregnancy and the associated abortion. Among others, efforts should be  
24 directed towards expanding modern family planning services and improving the friendliness and  
25 responsiveness of services to adolescents. Evidence-driven behavior change communications are needed  
26 to improve adolescent contraceptive-seeking behavior and positively impact SRH-related social norms.  
27 Also, there is a need to rigorously implement the domesticated Maputo protocol to improve access to  
28 safe abortion as well as abortion-related care experiences and outcomes for adolescents as well as older  
29 women. Overall, considerable efforts should be dedicated to strengthening the capacity of health and  
30 related social systems to be more adolescent-responsive: meaningful involvement of adolescents and  
31 adolescent-serving organizations in relevant policy and program decisions are important in this regard.  
32  
33  
34  
35  
36  
37  
38  
39  
40  
41  
42  
43  
44  
45  
46  
47  
48  
49  
50  
51  
52  
53  
54  
55  
56  
57  
58  
59  
60

1  
2  
3 **Contributors:** AOF led the conceptualisation of the research, and TR, PKK, and CM participated in the  
4 process. TR and AOF analysed the data. AOF wrote the original draft of the manuscript; TR, PKK, and CM  
5 participated in reviewing and editing the draft. PK and CM played leadership roles in the original data  
6 collection exercise.  
7  
8

9  
10 **Acknowledgments:** The authors are grateful to Akinrinola Bankole, Alanna Galati, Sarah Keogh, Sophia  
11 Sadinsky, and Elizabeth Sully for their review of the manuscript. We are also grateful to Florby Dorme,  
12 Meg Schurr and Madison Poore for support services.  
13

14 **Competing Interests:** The authors have no competing interests.  
15

16  
17 **Funding:** This study was made possible by the Dutch Ministry of Foreign Affairs (Activity #4000000282)  
18 and UK Aid from the UK Government (project #203177-101). The views expressed are those of the authors  
19 and do not necessarily reflect the positions and policies of the donors.  
20

21 **Patient and public involvement:** Patients and/or the public were not involved in the design, or conduct,  
22 or reporting, or dissemination plans of this research.  
23

24 **Patient consent for publication:** Not required.  
25

26  
27 **Ethics approval:** We obtained ethical approval from the institutional ethics board of the Guttmacher  
28 Institute (10 November 2015, DHHS identifier IRB00002197) and from the University of Kinshasa School  
29 of Public Health Ethics Committee (27 December 2015, approval number ESP/CE/010B/2015).  
30

31 **Provenance and peer review:** Not commissioned; externally peer reviewed.  
32

33 **Data availability statement:** Deidentified versions of the raw Health Facility Survey, Prospective  
34 Morbidity Survey and, Health Professional Survey Health datasets used by the authors  
35 are available from the Guttmacher Institute upon reasonable request to researchers who wish to use  
36 the data for scholarly analysis. To discuss obtaining copies of these datasets, please contact  
37 [popcenter@gutmacher.org](mailto:popcenter@gutmacher.org) with the detailed protocol for your proposed study, and information  
38 about the funding and resources you have to carry out the study.  
39  
40

#### 41 **ORCID iD**

42 Adesegun O. Fatusi [0000-0002-3893-8024](https://orcid.org/0000-0002-3893-8024).  
43  
44  
45  
46  
47  
48  
49  
50  
51  
52  
53  
54  
55  
56  
57  
58  
59  
60

## REFERENCES

1. Say L, Chou D, Gemmill A, et al. Global causes of maternal death: A WHO systematic analysis. *Lancet Glob Health* 2014;2:e323-33. doi:10.1016/S2214-109X(14)70227-X
2. Ganatra B, Gerdtz C, Rossier C, et al. Global, regional, and subregional classification of abortions by safety, 2010-14: estimates from a Bayesian hierarchical model. *Lancet* 2017;390:2372-2381. doi:10.1016/S0140-6736(17)31794-4
3. Lavelanet AF, Schlitt S, Johnson BR Jr, et al. Global abortion policies database: A descriptive analysis of the legal categories of lawful abortion. *BMC Int Health Hum Rights* 2018;18:44. doi:10.1186/s12914-018-0183-1
4. Président de la Cour Constitutionnelle, Circulaire Relative à La Mise En Exécution Des Dispositions de l'Article 14 Du Protocole à La Charte Africaine Des Droits de l'homme et Des Peuples Relative Aux Droits de La Femme En Afrique, Apr. 6, 2018. <http://www.leganet.cd/Legislation/JO/2018/jos.05.06.2018.o.pdf> (accessed 7 Jun 2019).
5. Chae S, Kayembe PK, Philbin J, et al. The incidence of induced abortion in Kinshasa, Democratic Republic of Congo, 2016. *PLoS ONE* 2017;12:e0184389. doi:10.1371/journal.pone.0184389
6. World Bank. Democratic Republic of Congo urbanization review: Productive and inclusive cities for an emerging Democratic Republic of Congo. Washington, DC: World Bank 2018. <https://openknowledge.worldbank.org/bitstream/handle/10986/28931/9781464812033.pdf?sequence=2> (accessed 9 Dec 2019).
7. Kwete D, Binanga A, Mukaba T, et al. Family planning in the Democratic Republic of the Congo: Encouraging momentum, formidable challenges. *Glob Health Sci Pract* 2018;6:40-54. doi:10.9745/GHSP-D-17-00346

- 1  
2  
3 8. Bankole A, Kayembe P, Chae S, et al. The severity and management of complications among  
4 postabortion patients treated in Kinshasa health facilities. *Int Perspect Sex Reprod Health*  
5  
6 2018;44:1-9. doi:10.1363/44e5618  
7  
8
- 9  
10 9. Ahmed S, Choi Y, Rimon JG, et al. Trends in contraceptive prevalence rates in sub-Saharan Africa  
11 since the 2012 London Summit on Family Planning: Results from repeated cross-sectional  
12 surveys. *Lancet Glob Health* 2019;7:e904-e911. doi: 10.1016/S2214-109X(19)30200-1  
13  
14
- 15  
16 10. Ishoso DK, Tshefu AK, Delvaux T, et. al. Extent of induced abortions and occurrence of  
17 complications in Kinshasa, Democratic Republic of the Congo. *Reprod Health* 2019;16:49.  
18  
19 doi:10.1186/s12978-019-0727-4  
20  
21
- 22  
23 11. Lupwana K, Clandestine and risk abortions of female adolescents by self-medication in the  
24 outskirts of Kinshasa: vulnerability factors. Paper presented at the Sixth African Population  
25  
26 Conference, Ouagadougou, Burkina Faso: Sixth African Population Conference, 2011.  
27  
28 <https://uaps2011.princeton.edu/abstracts/110572> (accessed 9 Jul 2019).  
29  
30
- 31  
32 12. Paluku LJ. Knowledge and attitude of schoolgirls about illegal abortions in Goma, Democratic  
33 Republic of Congo, *Afr J Prim Health Care Fam Med* 2010;2:a78. doi:10.4102/phcfm.v2i1.78  
34  
35
- 36  
37 13. Kayembe PK, Fatuma AB, Mapatano MA, et al. Prevalence and determinants of the use of  
38 modern contraceptive methods in Kinshasa, Democratic Republic of Congo, *Contraception* 2006;  
39  
40 74:400–406. doi:10.1016/j.contraception.2006.06.006  
41  
42
- 43  
44 14. Shah I, Ahman E. Age patterns of unsafe abortion in developing country regions. *Reprod Health*  
45  
46 *Matters* 2004;12:9-17. doi:10.1016/S0968-8080(04)24002-2  
47
- 48  
49 15. Shah IH, Ahman E. Unsafe abortion differentials in 2008 by age and developing country region:  
50  
51 high burden among young women. *Reprod Health Matters* 2012;20:169-73. doi:10.1016/S0968-  
52  
53 8080(12)39598-0  
54  
55  
56  
57  
58  
59  
60

- 1  
2  
3 16. Liang M, Simelane S, Fortuny Fillo G, et al. The state of adolescent sexual and reproductive  
4 health. *J Adolesc Health* 2019;65(6S):S3-S15. doi:10.1016/j.jadohealth.2019.09.015  
5  
6  
7  
8 17. Sedgh G, Finer LB, Bankole A, et al. Adolescent pregnancy, birth, and abortion rates across  
9 countries: levels and recent trends. *J Adolesc Health* 2015;56:223-30.  
10  
11 doi:10.1016/j.jadohealth.2014.09.007  
12  
13  
14 18. Chae S, Desai S, Crowell M, et al. Characteristics of women obtaining induced abortions in  
15 selected low- and middle-income countries. *PLoS One* 2017;12:e0172976.  
16  
17 doi:10.1371/journal.pone.0172976  
18  
19  
20  
21 19. Sully E, Dibaba Y, Fetters T, et al. Playing it safe: Legal and clandestine abortions among  
22 adolescents in Ethiopia. *J Adolesc Health* 2018;62:729-736.  
23  
24 doi:10.1016/j.jadohealth.2017.12.015  
25  
26  
27  
28 20. Sully EA, Atuyambe L, Bukenya J, et al. Estimating abortion incidence among adolescents and  
29 differences in postabortion care by age: A cross-sectional study of postabortion care patients in  
30 Uganda. *Contraception* 2018;98:510-516. doi:10.1016/j.contraception.2018.07.135  
31  
32  
33  
34 21. Riley T, Madziyire G, Chipato T, et al. Estimating adolescent abortion incidence and unintended  
35 pregnancy in Zimbabwe, 2016: A cross-sectional study. *BMJ Open* 2020;10:e034736.  
36  
37 doi:10.1136/bmjopen-2019-034736  
38  
39  
40  
41 22. Coast E, Norris AH, Moore AM, et al. Trajectories of women's abortion-related care: A  
42 conceptual framework. *Soc Sci Med* 2018;200:199-210. doi:10.1016/j.socscimed.2018.01.035  
43  
44  
45  
46 23. Singh S, Juarez F, Prada E, et al. Estimating abortion incidence: Assessment of a widely used  
47 indirect method. *Popul Res Policy Rev* 2019;38:429-458. doi:10.1007/s11113-019-09517-2  
48  
49  
50 24. Harlap S, Shiono P, Ramcharan S. A life table of spontaneous abortions and the effects of age,  
51 parity and other variables. In: Porter I, Hook E, eds. *Human Embryonic and Fetal Death*. New  
52 York, NY: Academic Press 1980:145-158.  
53  
54  
55  
56  
57  
58  
59  
60

- 1  
2  
3 25. Ministère du Plan et Suivi de la Mise en oeuvre de la Révolution de la Modernité  
4  
5 (MPSMRM/Congo), Ministère de la Santé Publique (MSP/Congo), ICF International. Enquête  
6  
7 Démographique et de Santé en République Démocratique du Congo 2013–2014. Rockville,  
8  
9 Maryland, USA: MPSMRM, MSP, and ICF International 2014.  
10  
11  
12 26. Institut National de la Statistique (INS). Annuaire Statistique 2014. Kinshasa, DRC: INS-RD Congo  
13  
14 2015.[https://www.undp.org/content/dam/dem\\_rep\\_congo/docs/MDG/Anuaire%20Statistique](https://www.undp.org/content/dam/dem_rep_congo/docs/MDG/Anuaire%20Statistique)  
15  
16 [https://www.undp.org/content/dam/dem\\_rep\\_congo/docs/MDG/Anuaire%20Statistique](https://www.undp.org/content/dam/dem_rep_congo/docs/MDG/Anuaire%20Statistique)  
17 [%20RDC%202014.pdf](https://www.undp.org/content/dam/dem_rep_congo/docs/MDG/Anuaire%20Statistique) (accessed 9 Jul 2019).  
18  
19 27. Leridon H, Helzner J. Table 4.20 Complete Table of Intrauterine Mortality per 100 Ova Exposed  
20  
21 to the Risk of Fertilization. In: Leridon H. Human Fertility: The Basic Components. Chicago:  
22  
23 University of Chicago Press 1977:81.  
24  
25 28. Li Z, Patton G, Sabet F, et al. Contraceptive use in adolescent girls and adult women in low- and  
26  
27 middle-income countries. *JAMA Netw Open* 2020;3:e1921437.  
28  
29 doi:10.1001/jamanetworkopen.2019.21437  
30  
31  
32 29. Performance Monitoring and Accountability 2020 (PMA2020). PMA2020/Kinshasa, DRC:  
33  
34 September-November 2017 (Round 6). Baltimore, MD: PMA2020.  
35  
36 <https://pma2020.org/sites/default/files/PMA2020-Kinshasa-DRC-R6-FP-Brief-En.pdf> (accessed 9  
37  
38 Jul 2019).  
39  
40  
41 30. Chandra-Mouli V, Parameshwar PS, Parry M, et al. A never-before opportunity to strengthen  
42  
43 investment and action on adolescent contraception, and what we must do to make full use of it.  
44  
45 *Reprod Health* 2017;14:85. doi:10.1186/s12978-017-0347-9  
46  
47  
48 31. Paul M, Chalasani S, Light B et al. Contraception for adolescents and youth: Responsive to their  
49  
50 sexual and reproductive health needs and rights. UNFPA 2019.  
51  
52 <https://www.unfpa.org/sites/default/files/resource->  
53  
54 [pdf/AY\\_Contraception\\_11Nov\\_UnfpaFonts\\_v2.pdf](https://www.unfpa.org/sites/default/files/resource-) (accessed 13 Mar 2020).  
55  
56  
57  
58  
59  
60

- 1  
2  
3 32. Mukendi DM, Mukalenge FC, Ali MM, et al. Exploring the adequacy of family planning services to  
4 adolescents needs: Results of a cross-sectional study from two settings in the Democratic  
5 Republic of the Congo. *Health Educ Public Health* 2019;2:131-141. doi:10.31488 /heph.111  
6  
7  
8  
9  
10 33. Muanda FM, Gahungu NP, Wood F, et al. Attitudes toward sexual and reproductive health  
11 among adolescents and young people in urban and rural DR Congo. *Reprod Health* 2018;15:74.  
12  
13  
14  
15  
16  
17 34. Casey SE, Steven VJ, Deitch J, et al. "You must first save her life": community perceptions  
18 towards induced abortion and post-abortion care in North and South Kivu, Democratic Republic  
19 of the Congo. *Sex Reprod Health Matters* 2019;27:1571309.  
20  
21  
22  
23  
24  
25  
26 35. Owolabi OO, Wong KLM, Dennis ML, et. al. Comparing the use and content of antenatal care in  
27 adolescent and older first-time mothers in 13 countries of West Africa: a cross-sectional analysis  
28 of Demographic and Health Surveys. *Lancet Child Adolesc Health* 2017;1:203-212.  
29  
30  
31  
32  
33  
34  
35  
36  
37  
38  
39  
40  
41  
42  
43  
44  
45  
46  
47  
48  
49  
50  
51  
52  
53  
54  
55  
56  
57  
58  
59  
60



**Table 1. Sociodemographic characteristics of post-abortion care patients, Kinshasa 2016**

|                                                      | Adolescents<br>(15-19)<br>N= 795            |      | Older Women<br>(20-49)<br>N= 4023 |      | All Women<br>(15-49)<br>N= 4990 |      | p-value |
|------------------------------------------------------|---------------------------------------------|------|-----------------------------------|------|---------------------------------|------|---------|
|                                                      | N                                           | %    | N                                 | %    | N                               | %    |         |
|                                                      | <b>I. Socio-demographic characteristics</b> |      |                                   |      |                                 |      |         |
| <b>Socioeconomic status</b>                          |                                             |      |                                   |      |                                 |      |         |
| Poor                                                 | 382                                         | 48.0 | 1558                              | 38.7 | 2026                            | 40.6 | <0.001  |
| Nonpoor                                              | 413                                         | 52.0 | 2465                              | 61.3 | 2965                            | 59.4 |         |
| <b>Educational level<sup>1</sup></b>                 |                                             |      |                                   |      |                                 |      |         |
| No or primary education                              | 149                                         | 18.7 | 430                               | 10.7 | 650                             | 13.1 | <0.001  |
| Post-primary education                               | 646                                         | 81.3 | 3592                              | 89.3 | 4327                            | 86.9 |         |
| <b>Marital status<sup>2</sup></b>                    |                                             |      |                                   |      |                                 |      |         |
| In union                                             | 292                                         | 37.9 | 2519                              | 62.6 | 2895                            | 58.3 | <0.001  |
| Not in union                                         | 479                                         | 62.1 | 1504                              | 37.4 | 2070                            | 41.7 |         |
| <b>II. Reproductive characteristics</b>              |                                             |      |                                   |      |                                 |      |         |
| <b>Previous pregnancies</b>                          |                                             |      |                                   |      |                                 |      |         |
| 0                                                    | 396                                         | 49.8 | 538                               | 13.4 | 971                             | 19.5 | <0.001  |
| ≥1                                                   | 399                                         | 50.2 | 3485                              | 86.6 | 4019                            | 80.5 |         |
| <b>Previous miscarriage<sup>a</sup></b>              |                                             |      |                                   |      |                                 |      |         |
| No                                                   | 593                                         | 74.7 | 2730                              | 67.9 | 3453                            | 69.2 | <0.001  |
| Yes                                                  | 202                                         | 25.3 | 1292                              | 32.1 | 1536                            | 30.8 |         |
| <b>Previous abortion<sup>a</sup></b>                 |                                             |      |                                   |      |                                 |      |         |
| No                                                   | 640                                         | 80.5 | 2893                              | 71.9 | 3653                            | 73.2 | <0.001  |
| Yes                                                  | 155                                         | 19.5 | 1129                              | 28.1 | 1336                            | 26.8 |         |
| <b>Pregnancy intention</b>                           |                                             |      |                                   |      |                                 |      |         |
| Intended                                             | 99                                          | 12.5 | 1204                              | 29.9 | 1323                            | 26.5 | <0.001  |
| Unintended/not sure                                  | 695                                         | 87.5 | 2818                              | 70.1 | 3667                            | 73.5 |         |
| <b>Pre-pregnancy contraceptive use</b>               |                                             |      |                                   |      |                                 |      |         |
| No                                                   | 664                                         | 83.5 | 2828                              | 70.3 | 3627                            | 72.7 | <0.001  |
| Yes                                                  | 131                                         | 16.5 | 1195                              | 29.7 | 1364                            | 27.3 |         |
| <b>Gestational age of index abortion<sup>3</sup></b> |                                             |      |                                   |      |                                 |      |         |
| First trimester                                      | 592                                         | 75.7 | 3156                              | 80.9 | 3916                            | 80.6 | 0.001   |
| second or third trimester                            | 190                                         | 24.3 | 746                               | 19.1 | 941                             | 19.4 |         |
| <b>Interfered with pregnancy</b>                     |                                             |      |                                   |      |                                 |      |         |
| No                                                   | 393                                         | 49.4 | 2430                              | 60.2 | 2823                            | 58.4 | <0.001  |
| Yes                                                  | 402                                         | 50.6 | 1605                              | 39.8 | 2007                            | 41.6 |         |
| <b>Source of help in pregnancy interference</b>      |                                             |      |                                   |      |                                 |      |         |
| Medical professional                                 | 148                                         | 36.8 | 730                               | 45.5 | 878                             | 43.7 | 0.002   |
| Non-medical professional                             | 254                                         | 63.2 | 875                               | 54.5 | 1129                            | 56.3 |         |
| <b>Severity of complication</b>                      |                                             |      |                                   |      |                                 |      |         |
| None/Mild                                            | 251                                         | 31.5 | 1574                              | 39.1 | 1824                            | 39.1 | <0.001  |
| Moderate/Severe                                      | 544                                         | 68.5 | 2449                              | 60.9 | 2994                            | 60.9 |         |

**Received post-abortion contraceptive**

|     |     |      |      |      |      |       |        |
|-----|-----|------|------|------|------|-------|--------|
| Yes | 72  | 9.1  | 665  | 16.5 | 752  | 15.1% | <0.001 |
| No  | 711 | 89.5 | 3344 | 83.1 | 4213 | 84.4% |        |

**Pregnancy resulting from forced sex**

|                           |     |      |      |      |      |       |        |
|---------------------------|-----|------|------|------|------|-------|--------|
| Reported experience       | 79  | 9.9  | 160  | 4.0  | 239  | 4.9%  | <0.001 |
| Did not report experience | 716 | 90.1 | 3875 | 96.0 | 4591 | 95.1% |        |

**III. Time taken to reach health facility**

|                                       |     |  |     |  |     |  |       |
|---------------------------------------|-----|--|-----|--|-----|--|-------|
| Mean number of days to reach facility | 4.0 |  | 4.4 |  | 4.2 |  | 0.214 |
|---------------------------------------|-----|--|-----|--|-----|--|-------|

---

<sup>1</sup> 1 missing respondent each from educational level, previous miscarriage, previous abortion and pregnancy intention for older women group

<sup>2</sup> 23 missing respondents from marital variable for adolescents

<sup>3</sup> 13 missing respondents for gestational age at abortion for adolescents and 120 for older women category

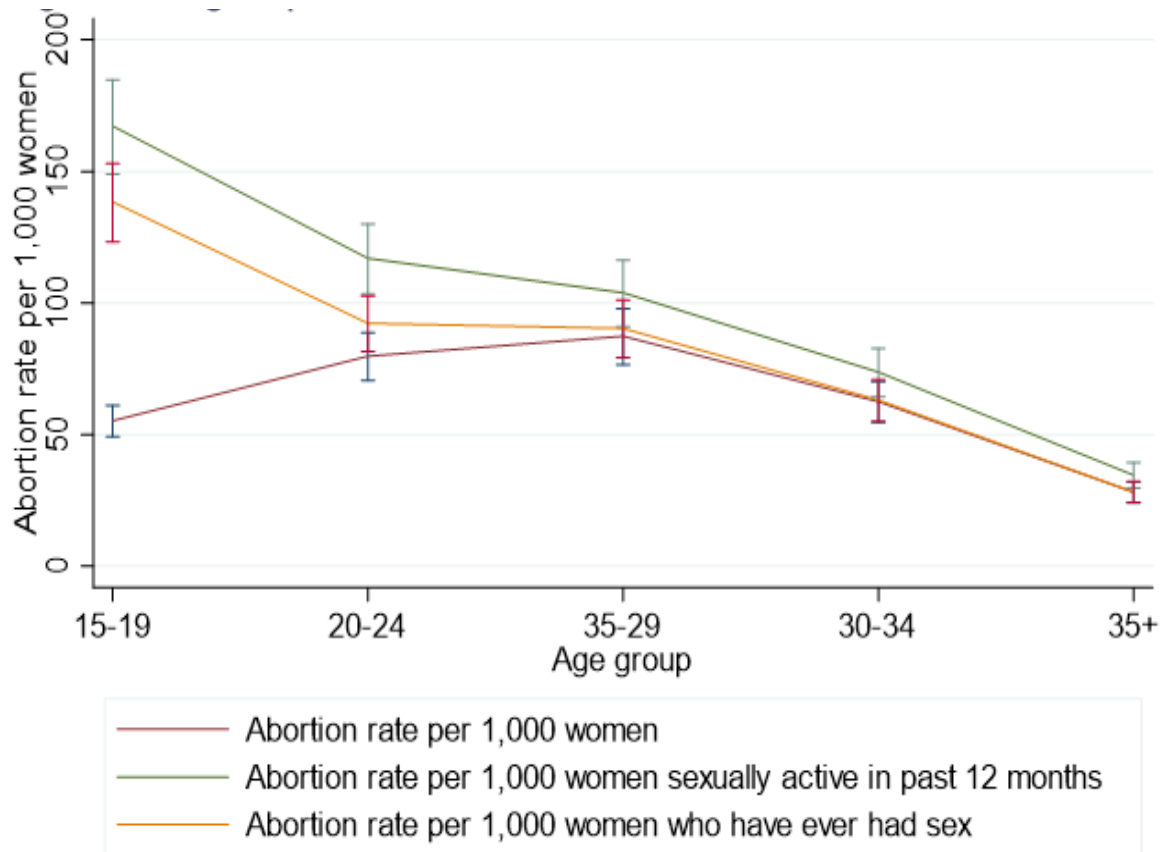

Figure 1: Abortion estimates by age group in Kinshasa, DRC, for all women, ever-sexually active women, and recently sexually active women, 2016

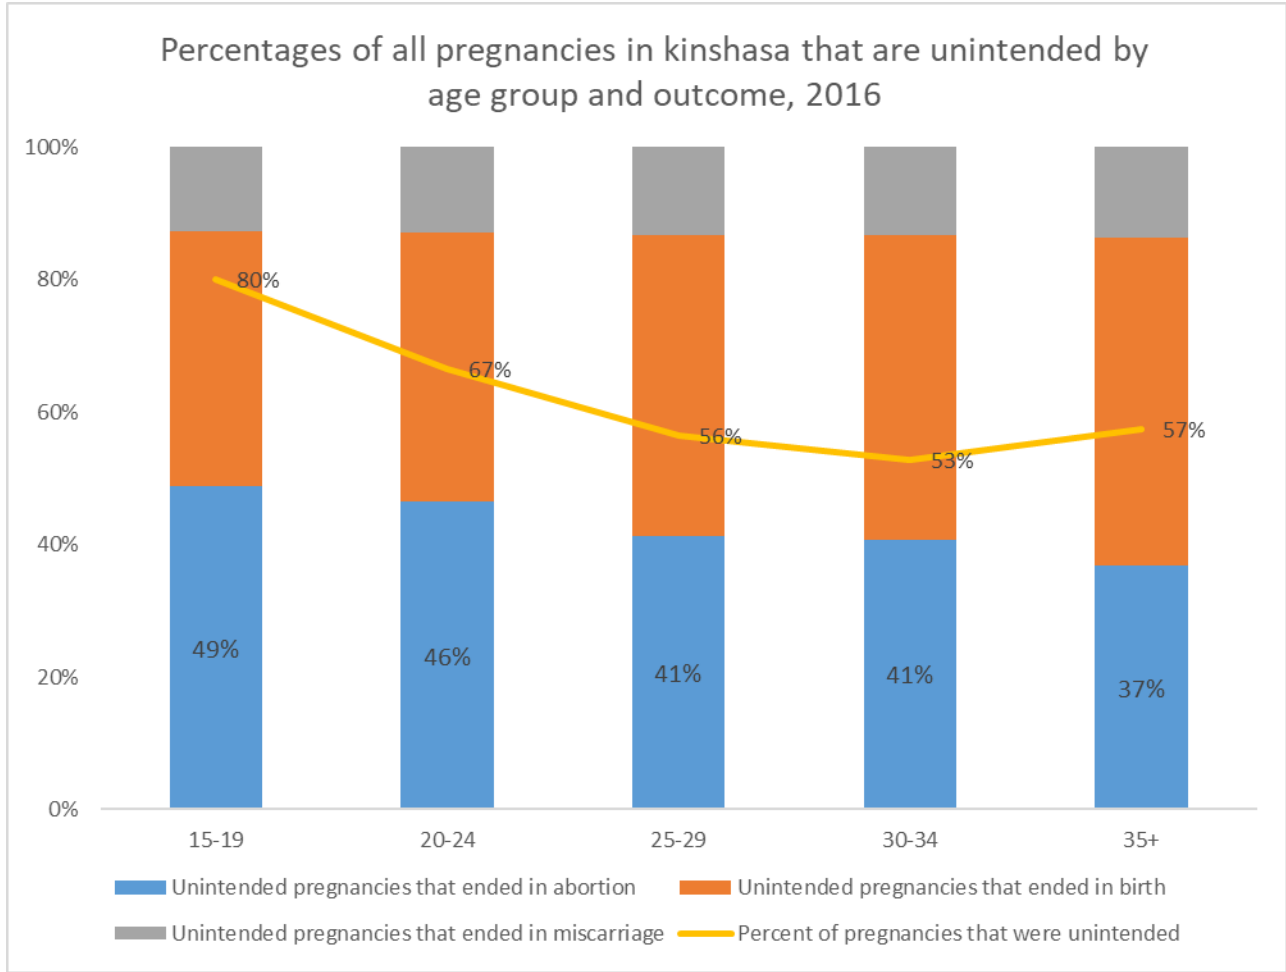

Figure 2: Percentage of all pregnancies in Kinshasa, DRC, that are unintended by age group and outcome, 2016.

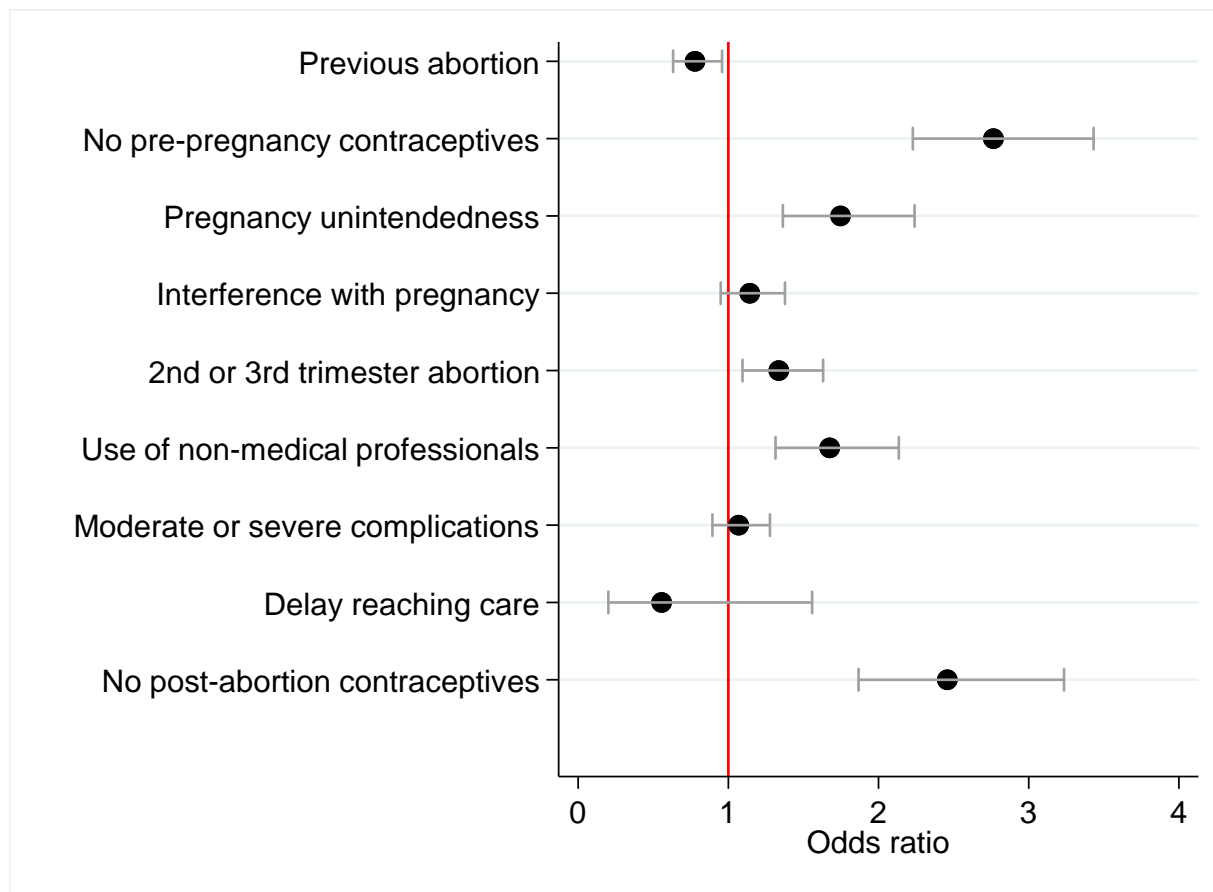

**Figure 3: Adjusted odds ratios, hazard ratios and 95% confidence intervals of abortion care experiences among adolescent postabortion care patients as compared to older postabortion care patients in Kinshasa, DRC, 2016.**

# BMJ Open

## Unintended pregnancy, induced abortion and abortion care-seeking experiences among adolescents in Kinshasa, Democratic Republic of Congo: a cross-sectional study

|                                 |                                                                                                                                                                                                                                                                                                                                                                                                                                                                   |
|---------------------------------|-------------------------------------------------------------------------------------------------------------------------------------------------------------------------------------------------------------------------------------------------------------------------------------------------------------------------------------------------------------------------------------------------------------------------------------------------------------------|
| Journal:                        | <i>BMJ Open</i>                                                                                                                                                                                                                                                                                                                                                                                                                                                   |
| Manuscript ID                   | bmjopen-2020-044682.R1                                                                                                                                                                                                                                                                                                                                                                                                                                            |
| Article Type:                   | Original research                                                                                                                                                                                                                                                                                                                                                                                                                                                 |
| Date Submitted by the Author:   | 06-Jul-2021                                                                                                                                                                                                                                                                                                                                                                                                                                                       |
| Complete List of Authors:       | Fatusi, Adesegun; Guttmacher Institute; School of Public Health, University of Medical Sciences, Ondo, Ondo State, Nigeria<br>Riley, Taylor; Guttmacher Institute, Kayembe, Patrick K.; Department of Epidemiology & Biostatistics, School of Public Health, University of Kinshasa, Kinshasa, Democratic Republic of Congo<br>Mabika, Crispin; Department of Population Sciences and Development, University of Kinshasa, Kinshasa, Democratic Republic of Congo |
| <b>Primary Subject Heading</b>: | Public health                                                                                                                                                                                                                                                                                                                                                                                                                                                     |
| Secondary Subject Heading:      | Reproductive medicine, Obstetrics and gynaecology                                                                                                                                                                                                                                                                                                                                                                                                                 |
| Keywords:                       | REPRODUCTIVE MEDICINE, PUBLIC HEALTH, OBSTETRICS                                                                                                                                                                                                                                                                                                                                                                                                                  |
|                                 |                                                                                                                                                                                                                                                                                                                                                                                                                                                                   |

SCHOLARONE™  
Manuscripts



I, the Submitting Author has the right to grant and does grant on behalf of all authors of the Work (as defined in the below author licence), an exclusive licence and/or a non-exclusive licence for contributions from authors who are: i) UK Crown employees; ii) where BMJ has agreed a CC-BY licence shall apply, and/or iii) in accordance with the terms applicable for US Federal Government officers or employees acting as part of their official duties; on a worldwide, perpetual, irrevocable, royalty-free basis to BMJ Publishing Group Ltd ("BMJ") its licensees and where the relevant Journal is co-owned by BMJ to the co-owners of the Journal, to publish the Work in this journal and any other BMJ products and to exploit all rights, as set out in our [licence](#).

The Submitting Author accepts and understands that any supply made under these terms is made by BMJ to the Submitting Author unless you are acting as an employee on behalf of your employer or a postgraduate student of an affiliated institution which is paying any applicable article publishing charge ("APC") for Open Access articles. Where the Submitting Author wishes to make the Work available on an Open Access basis (and intends to pay the relevant APC), the terms of reuse of such Open Access shall be governed by a Creative Commons licence – details of these licences and which [Creative Commons](#) licence will apply to this Work are set out in our licence referred to above.

Other than as permitted in any relevant BMJ Author's Self Archiving Policies, I confirm this Work has not been accepted for publication elsewhere, is not being considered for publication elsewhere and does not duplicate material already published. I confirm all authors consent to publication of this Work and authorise the granting of this licence.

1  
2  
3 **Unintended pregnancy, induced abortion and abortion care-seeking experiences among adolescents in**  
4  
5 **Kinshasa, Democratic Republic of Congo: a cross-sectional study**  
6  
7  
8  
9

10 Adesegun O. Fatusi,<sup>1,2\*</sup> Taylor Riley,<sup>1</sup> Patrick K. Kayembe,<sup>3</sup> Crispin Mabika<sup>4</sup>  
11  
12  
13

14 <sup>1</sup> Guttmacher Institute, New York, United States of America  
15

16 <sup>2</sup>School of Public Health, University of Medical Sciences, Ondo, Ondo State, Nigeria  
17

18 <sup>3</sup> Department of Epidemiology & Biostatistics, School of Public Health, University of Kinshasa, Kinshasa,  
19 Democratic Republic of Congo  
20

21 <sup>4</sup>Department of Population Sciences and Development, University of Kinshasa, Kinshasa, Democratic  
22 Republic of Congo  
23  
24  
25  
26  
27

28 **\*Corresponding Author:**  
29

30 Adesegun O. Fatusi  
31

32 [adesegunfatusi@gmail.com](mailto:adesegunfatusi@gmail.com)  
33  
34  
35  
36  
37  
38  
39  
40  
41  
42  
43  
44  
45  
46  
47  
48  
49  
50  
51  
52  
53  
54  
55  
56  
57  
58  
59  
60



## Abstract

**Objectives:** To estimate age-specific abortion incidence and unintended pregnancy in Kinshasa, Democratic Republic of Congo (DRC) and compare care-experiences between adolescents (15-19 years) and older women (20-49 years).

**Design:** We used the age-specific variant of the Abortion Incidence Complications Method to estimate abortion and unintended pregnancy, with data from three primary sources: Health Facility Survey (n=361) provided post-abortion care (PAC) caseloads; Prospective Morbidity Survey (n=1,031) provided the age distribution and characteristics of women presenting for PAC; and, Health Professional Survey (n=115) provided an estimate of the proportion of abortions resulting in facility-based treatment of complications. Bivariate (chi-square, t-test) and multivariable (binary logistic regression, Cox proportional hazard) analyses were used to compare abortion care experiences.

**Setting:** Health facilities providing PAC in Kinshasa

**Participants:** Women who presented to PAC facilities with abortion complications and their care providers.

**Primary and secondary outcome measures:** The primary measures were abortion incidence and proportion of pregnancies unintended. The secondary measures were the odds of reporting specific abortion-care experiences.

**Results:** Adolescents had an estimated 27,590 induced abortions, constituting 18.8% of abortions in Kinshasa in 2016. Adolescents had the lowest abortion rate among women less than 35 years (55.2/1,000 women) but the highest rate among ever sexually active women (138.4/1,000) and recently sexually active women (167.2/1,000). Also, adolescents had the highest abortion ratio (82.4/100 live births), proportion of pregnancies unintended (80%), and proportion of unintended pregnancies ending in abortion (49%). Compared to older women, adolescents had higher odds of reporting pregnancy unintendedness (AOR= 1.36, 95% C.I.=1.75-2.24), seeking abortion at later than first trimester (AOR= 1.34, 95% C.I.=1.09-1.63) and from non-medical professionals (AOR= 1.68, 95% C.I.=1.31-2.14), and not using contraceptives before pregnancy (AOR= 2.23, 95% C.I.=2.77-3.43) or post-abortion (AOR= 2.46, 95% C.I.=1.87-3.29).

**Conclusions:** Interventions are needed to reduce unintended pregnancy among adolescents in Kinshasa and improve their abortion-care experiences.

### Strengths and limitations of the study

- This study provides the first age-specific estimates of unintended pregnancy and abortion for Kinshasa, DRC.
- The underlying data on the number of PAC patients comes from a census of postabortion care (PAC) providing facilities in Kinshasa, and the weighted age and subgroup distribution of PAC patients is from a representative sample of PAC-providing facilities.
- In the absence of an age-specific multiplier, we uniformly applied a nationally-obtained multiplier from a representative sample of PAC cases to all the age groups to obtain the age-specific induced abortions estimates: this may bias the estimate for specific age groups.

## INTRODUCTION

Unsafe abortion is a public health challenge that is associated with at least 8% of global maternal deaths.<sup>1</sup>

The burden of unsafe abortion is highest in countries with restrictive abortion laws and approximately 97% of unsafe abortions and nearly all abortion-related deaths occur in low- and middle-income countries (LMICs).<sup>2</sup> Africa, which has the highest risk of abortion-related deaths globally,<sup>2</sup> presents striking statistics: most African countries have restrictive laws<sup>3</sup> and induced abortions\* occur mostly in a clandestine manner, with the result of over three-quarters (75.6%) of the estimated annual 6.86 million abortions in Africa being unsafe.<sup>2</sup>

Democratic Republic of Congo (DRC), the third most populous country in Africa, previously had a restrictive penal code that forbade abortion under any circumstances but domesticated the African Charter on Human and People's Rights on the Rights of Women (Maputo Protocol) that permits abortion on some health grounds in 2018.<sup>4</sup> However, abortion remains largely clandestine in DRC.<sup>5</sup> With an estimated population of 12 million in 2016, Kinshasa, the capital of DRC, is the second most populous and densest city in sub-Saharan Africa.<sup>6</sup> Kinshasa has a high level of unmet need for contraception<sup>7-9</sup> and many women undergo abortions to meet their fertility aspirations.<sup>5,8,10</sup> Two studies involving different methodological approaches – the Confidante Method<sup>10</sup> and Abortion Incidence Complications Method (AICM)<sup>5</sup> similarly estimated Kinshasa's abortion rate as 55-56 per 1,000 women aged 15-49 for 2015/2016. While some small-scale studies suggest a substantial level of adolescent abortion in Kinshasa,<sup>11-13</sup> adolescent-specific abortion estimates are lacking.

---

\* While we recognize that the term "abortion" technically covers both induced abortion and spontaneous abortion (miscarriages), unless otherwise specified, abortion as used in this paper refers to induced abortion.

1  
2  
3 Globally, studies on adolescent-specific abortion measures are rare, despite indications that adolescents  
4 contribute significantly to the abortion burden and are potentially at greater risks of complications  
5 associated with lower rates of healthcare access.<sup>14,15</sup> As a 2019 review to mark the 25<sup>th</sup> anniversary of the  
6 International Conference on Population and Development notes, “Data on the specific levels and trends  
7 in abortion measures that are specific to adolescents are scarce, particularly among developing  
8 countries.”<sup>16</sup> Studies comparing abortion measures for adolescents and older women are also scarce and  
9 the findings from the few existing studies vary considerably.<sup>17</sup> In Africa, compared with older women (20-  
10 49 years), higher adolescent abortion rates have been reported for Nigeria,<sup>18</sup> but lower rates for Gabon,  
11 Ghana, Republic of Congo, and Zimbabwe.<sup>17,18</sup>

12  
13  
14  
15  
16  
17  
18  
19  
20  
21  
22  
23  
24  
25 Among African countries, recent adolescent-specific abortion estimates are only available for Ethiopia,<sup>19</sup>  
26 Uganda,<sup>20</sup> and Zimbabwe.<sup>21</sup> These recent papers, unlike previous works, adjusted for sexual activity and,  
27 therefore, provide estimates specifically for sexually active adolescents and older women, which make for  
28 a more valid comparison between the age groups. While sexually active adolescents had a higher abortion  
29 rate compared to older women in Ethiopia<sup>19</sup> and Uganda,<sup>20</sup> but the reverse was the case in Zimbabwe.<sup>21</sup>  
30 The differential findings probably reflect contextual sexual and reproductive health (SRH) dynamics and  
31 highlight the need for studies in different geographies. So far, no comparison of abortion incidence for  
32 adolescents and older women exist in the literature for Kinshasa, DRC, as age-specific estimates are  
33 lacking. Generating age-specific abortion and unintended pregnancy measures is crucial for understanding  
34 the burden of unintended pregnancy and abortion among adolescents and for advocating for relevant  
35 interventions to improve their health and wellbeing.<sup>9</sup>

36  
37  
38  
39  
40  
41  
42  
43  
44  
45  
46  
47  
48  
49  
50  
51  
52 Comparing adolescent and non-adolescent abortion-related care experiences, including post-abortion  
53 care, is also important as the experiences have significant implications for the health outcomes and well-  
54

1  
2  
3 being of the women seeking abortions, as well as for health systems treating abortion complications.  
4  
5 Some of the existing studies suggest that the quality of care and the experiences of adolescents in the  
6  
7 context of abortion may differ significantly from that of older women<sup>19,22</sup> but these findings are by no  
8  
9 means universal and vary by geographical and socio-economic contexts. So far, no published studies have  
10  
11 compared the abortion care experiences of adolescents and older women in Kinshasa, DRC. Analyzing  
12  
13 differences that may exist in the abortion-care experiences of adolescents and older women can generate  
14  
15 relevant information for appropriate interventions to address any potential adolescent-specific barriers  
16  
17 to relevant care.  
18  
19  
20  
21  
22

23 This study aims to address the existing evidence gap relating to age-specific analyses of abortion incidence  
24  
25 and abortion care experience in Kinshasa, DRC. Our primary objective is to estimate and compare  
26  
27 unintended pregnancy and abortion incidence for adolescents and older women in Kinshasa. Secondly,  
28  
29 we compare the abortion care experiences of adolescents and older post-abortion care patients.  
30  
31  
32  
33

## 34 **METHODS**

### 35 **Study Design and Data Sources**

36  
37 We used the age-specific variant of AICM<sup>19,20</sup> to indirectly estimate abortion and unintended pregnancy  
38  
39 for adolescents (15-19) and older women (20-49). Developed in the early 1990s, the AICM has been  
40  
41 used to estimate abortion incidence for 23 LMICs as of 2017.<sup>23</sup> The age-specific AICM uses three  
42  
43 primary data sources: Health Facility Survey (HFS), which provides post-abortion care (PAC) caseloads;  
44  
45 Prospective Morbidity Survey (PMS), which provides the age distribution and characteristics of women  
46  
47 presenting for PAC and their care-seeking behavior and experience; and, Health Professional Survey  
48  
49 (HPS) that provides an estimate of the proportion of abortions that results in facility-based treatment of  
50  
51  
52  
53  
54  
55  
56  
57  
58  
59  
60

1  
2  
3 abortion complications, the inverse of which serves as the multiplier or adjustment factor in the AICM  
4  
5 approach.  
6  
7  
8  
9

10 The current study is based on data collected in 2016 to estimate abortion incidence for Kinshasa. The  
11  
12 HFS was conducted in a representative sample of 361 facilities with the capacity to provide PAC. The  
13  
14 PMS was prospectively conducted for 30 days in 223 of the 361 HFS facilities with data from 1,031 PAC  
15  
16 patients. The HPS was a purposive sample of 115 health professionals who are knowledgeable about  
17  
18 abortion practices in Kinshasa. Details of the study design have previously been published by Chae and  
19  
20 colleagues, including various steps taken to minimize bias in the data collection process.<sup>5</sup> The  
21  
22 Institutional Review Boards of Guttmacher Institute and the University of Kinshasa, School of Public  
23  
24 Health approved the study.  
25  
26  
27  
28  
29

### 30 **Patient and public involvement**

31  
32 We did not directly involve abortion patients in the study planning but the original data collection that  
33  
34 provided the foundation for this study sought and received guidance for study planning and results  
35  
36 dissemination from a Technical Advisory Committee, which included community representatives and  
37  
38 technical experts, and the current study also received similar guidance.  
39  
40  
41  
42  
43

### 44 **Data Analysis**

#### 45 *Abortion measures*

46  
47 Our age-specific estimation of abortion incidence involved three key sequential steps. Firstly, we applied  
48  
49 the age distribution of PAC patients from the PMS to the total PAC caseloads reported by Chae et al<sup>5</sup> for  
50  
51 women age 15-49 to obtain the PAC caseloads for five-year age groups. Secondly, recognizing that PAC  
52  
53 caseloads include both induced and spontaneous abortion (miscarriages), we calculated the number of  
54  
55  
56  
57  
58  
59  
60

1  
2  
3 treated second-trimester miscarriages through a two-step process and subtracted the obtained figure  
4  
5 from the PAC caseloads. The initial step involved estimating second-trimester miscarriages requiring  
6  
7 treatment with the assumption that only second trimester miscarriages (13-22 weeks) would result in  
8  
9 facility-based care as is the practice in the AICM approach.<sup>23</sup> Clinical data from Harlap and colleagues  
10  
11 show that second-trimester miscarriages constitute 2.9% of all known pregnancies and 3.41% of live  
12  
13 births;<sup>24</sup> applying the age-specific life tables developed based on that data by Sully et al.,<sup>19</sup> we estimated  
14  
15 the number of second-trimester miscarriages for the five-year age groups. Then, in line with previous  
16  
17 AICM studies,<sup>23</sup> we estimated the proportion of second-trimester miscarriages that received facility care  
18  
19 as equal to the age-specific proportion of facility-based deliveries obtained from the 2013-14  
20  
21 Demographic and Health Survey (DHS) data for Kinshasa.<sup>25</sup> Subtracting the number of treated second-  
22  
23 trimester miscarriages from the total age-specific PAC caseloads resulted in the age-specific PAC cases  
24  
25 attributable to induced abortion.  
26  
27  
28  
29  
30  
31

32 Thirdly, we estimated abortions that did not result in facility-based care by using the multiplier, which is  
33  
34 the inverse of the proportion of all abortions that result in complications and facility-based care as  
35  
36 estimated in the HPS. As age-specific multipliers are not available, we applied the overall multiplier  
37  
38 generated by Chae et al<sup>5</sup> uniformly across the age groups to estimate the number of induced abortions  
39  
40 for each age group. We then summed the estimates obtained for all age-groups and proportionally  
41  
42 adjusted the age-specific estimates to ensure that the sum equaled the figure previously reported by  
43  
44 Chae et al<sup>5</sup> for women age 15-49 years.  
45  
46  
47  
48  
49

50 As standardly defined, we calculated the age-specific abortion incidence rate as the number  
51  
52 of abortions per 1,000 women per age group and abortion ratio as the number of abortions per 100 live  
53  
54 births for each age-group. To address age-related differential sexual activity we calculated abortion  
55  
56  
57  
58  
59  
60

1  
2  
3 incidence for women who ever had sex and women with recent sexual activity (defined as sex within 12  
4 months before the survey).<sup>19,20</sup>  
5  
6  
7

### 8 9 10 *Unintended pregnancy*

11 We calculated unintended pregnancy as the sum of three events: (i) induced abortion (explained above),  
12 (ii) unintended births, defined as births that were unplanned at the time of conception (either unwanted  
13 or mistimed) and obtained from the DHS, and (iii) unintended pregnancies that ended in miscarriage.  
14  
15  
16

17 The number of unintended births was obtained by multiplying the age-specific proportion of unplanned  
18 births documented in the DHS report by the number of age-specific births, which was calculated by  
19 applying age-specific fertility rates from the 2013–14 DRC DHS<sup>25</sup> to age-specific population estimates of  
20 women of reproductive age (15-49 years) in Kinshasa.<sup>26</sup> Based on the work of Leridon and Helner<sup>27</sup> and  
21 in line with the AICM approach,<sup>23</sup>Error! Bookmark not defined. unintended pregnancies ending in miscarriage were  
22 calculated as the sum of 20% of unplanned live births and 10% of induced abortions. Intended  
23 pregnancies were calculated as the sum of planned births (obtained by subtracting unplanned births  
24 from the total number of births) and miscarriages from intended pregnancies (estimated as 20% of  
25 planned births).<sup>27</sup>  
26  
27  
28  
29  
30  
31  
32  
33  
34  
35  
36  
37  
38  
39  
40

### 41 *Abortion-related experiences*

42 Using the PMS data of women receiving PAC (following either induced abortions or miscarriages), we  
43 compared the background characteristics and experiences of adolescent and older women regarding  
44 abortion. Specifically, we compared the socio-demographic and reproductive characteristics for  
45 adolescents and older women using chi-square and compared the mean number of days to reach PAC  
46 (to assess a possible delay in reaching care) using t-test. We further compared adolescents and older  
47 PAC patients using multivariable analyses for nine abortion-related and care experiences: : (i) history of  
48  
49  
50  
51  
52  
53  
54  
55  
56  
57  
58  
59  
60



1  
2  
3 previous abortion; (ii) contraception at the time of pregnancy; (iii) intendedness of index pregnancy; (iv)  
4 gestational age at abortion (first trimester versus later); (v) interference with pregnancy (inducing  
5 abortion); (vi) professional status of the abortion service provider (medical professionals versus others);  
6  
7 (vii) severity of postabortion complication (none/mild versus moderate/severe); (viii) delay in reaching  
8 care (sum of the total number of days taken to decide to seek care and to reach the first health facility);  
9  
10 and, (ix) provision of postabortion contraceptives by PAC provider. We controlled for marital status,  
11  
12 education, economic level (poor or non-poor status) based on household wealth index, previous  
13  
14 pregnancy, and pregnancy intention (except when pregnancy intendedness was the dependent variable)  
15  
16 in each multivariable model. We used binary logistic regression for multivariable analyses and obtained  
17  
18 the adjusted odds ratio (AOR) and the 95% Confidence Interval (C.I.), except in the case of the number  
19  
20 of days taken to reach PAC where we used a Cox proportional hazard model and obtained the hazard  
21  
22 ratio (HR), and 95% C.I. Analyses were undertaken using Stata version 16 and SPSS version 24.  
23  
24  
25  
26  
27  
28  
29  
30  
31

## 32 RESULTS

### 33 Incidence of abortion

34  
35 An estimated 27,590 induced abortions occurred among adolescents, constituting 18.8% of the 146,713  
36  
37 abortions in Kinshasa in 2016: this proportion is similar to the percentage of women of reproductive age  
38  
39 (15-49 years) who are adolescents (19.5%). Adolescents have the lowest abortion rate (55.2 per 1,000  
40  
41 women) among women less than 35 years of age. However, restricting the sample to only sexually active  
42  
43 women, the abortion rate shows an inverse relationship with age, and adolescents have the highest rate  
44  
45 among all women of reproductive age (Figure 1). The abortion rate is 138.4/1,000 for adolescents who  
46  
47 ever had sex and 167.2/1,000 for recently sexually active adolescents. In comparison, for older age groups,  
48  
49 the abortion rate ranges from 28.2/1,000 to 92.3/1,000 for those who ever had sex, and from 34.6/1,000  
50  
51 to 117.0/1,000 for recently sexually active women. The abortion ratio also shows an inverse relationship  
52  
53  
54  
55  
56  
57  
58  
59  
60

1  
2  
3 with age, and adolescents have the highest ratio (82.4 per 100 live births versus 33.1/100 – 56.2/100 live  
4  
5 births for older women).  
6  
7

### 8 **Unintended pregnancy**

9  
10 An estimated 70,733 pregnancies occurred among adolescents – about 12.5% of the 563,064 pregnancies  
11  
12 estimated for Kinshasa in 2016. Eighty percent of pregnancies among adolescents are unintended  
13  
14 compared to the lower range of 53%-67% for older age groups (Figure 2). The proportion of unintended  
15  
16 pregnancies that ended in abortion shows an inverse relationship with age, decreasing progressively from  
17  
18 49% for age 15-19 years to 37% for age  $\geq 35$  years. Unlike in older age groups (age 25-49 years), the  
19  
20 proportion of unintended pregnancies ending in abortion is higher than those ending in births among  
21  
22 adolescents (49% vs 39%) and other young people age 20-24 (46% versus 41%).  
23  
24  
25  
26  
27  
28

### 29 **Abortion-related experiences**

30  
31 Compared to older women aged 20-49 years, bivariate analysis shows that adolescent PAC clients were  
32  
33 significantly less likely to be in union (38% vs 63%,  $p < 0.001$ ) but significantly more likely to come from  
34  
35 poor households (48% vs. 39%,  $p < 0.001$ ) and have post-primary education (19% vs. 10%,  $p < 0.001$ ) (Table  
36  
37 1). Adolescents are less likely to use contraceptives before pregnancy (16% vs. 30%,  $p < 0.001$ ), report their  
38  
39 pregnancy as being intended (13% vs 30%,  $p < 0.001$ ), or receive post-abortion contraceptives (9% vs. 17%,  
40  
41  $p < 0.001$ ). However, adolescents were more likely to report the index pregnancy as induced (51% vs 40%,  
42  
43  $p < 0.001$ ) as well as seek abortion at a later gestation age than the first trimester (81% vs 76%,  $p = 0.001$ )  
44  
45 and from non-medical professionals (37% vs 44%,  $p = 0.001$ ). A higher proportion of adolescents compared  
46  
47 to older PAC patients also reported experiencing moderate/severe complications (68% vs 61%,  $p < 0.001$ )  
48  
49 or that the index pregnancy resulted from forced sex (9.9% vs 4.9%,  $p < 0.001$ ). Adolescents and older  
50  
51 women did not significantly differ in the time taken to reach PAC services (4.0 days vs. 4.4 days,  $p = 0.214$ )  
52  
53  
54  
55  
56  
57  
58  
59  
60

Multivariable analysis (Figure 3) shows that controlling for the effect of other factors, adolescent PAC patients have significantly higher odds of unintended pregnancy (AOR= 1.36, 95% C.I.=1.75-2.24), not using contraceptives before pregnancy (AOR= 2.23, 95% C.I.=2.77-3.43), but lower odds of history of previous abortion (AOR=0.78; 95% C.I.=0.63-0.96) compared to older PAC patients. Also, adolescent PAC patients have higher odds of seeking abortion at later gestational age (second or third trimester) (AOR= 1.34, 95% C.I.=1.09-1.63) and from non-medical professionals (AOR= 1.68, 95% C.I.=1.31-2.14) and not receiving post-abortion contraceptives (AOR= 2.46, 95% C.I.=1.87-3.29). However, adolescents and older PAC patients did not significantly differ in terms of interfering with the index pregnancy (induced abortion), experiencing post-abortion complications, and the time taken to reach PAC services.

## DISCUSSION

This study, to the best of our knowledge, provides the first age-specific estimates of unintended pregnancy and abortion for Kinshasa, DRC. Regarding abortion among women aged less than 35 years, adolescents recorded the lowest rate in this study. However, when we considered only women who have ever had sex and thereby exposed to the possibility of pregnancy, adolescents have the highest rate of abortion among ever sexually active and recently sexually-active women, similar to the findings in Ethiopia<sup>19</sup> and Uganda<sup>20</sup> but contrary to the findings in Zimbabwe.<sup>21</sup> Compared to their peers in Zimbabwe (15.9/1,000),<sup>21</sup> Uganda (76.1/1,000),<sup>20</sup> and Ethiopia (90.7/1,000),<sup>19</sup> Error! Bookmark not defined. the abortion rate is substantially higher for recently sexually active adolescents in Kinshasa (167.2/1,000).

Compared to older women, adolescents have a higher rate of unintended pregnancy in Kinshasa. The proportion of pregnancy that is unintended is also substantially higher for adolescents in Kinshasa (80%) compared to their counterparts in Ethiopia,<sup>19</sup> Uganda,<sup>20</sup> and Zimbabwe<sup>21</sup> where about half of all pregnancies or less are unintended – and likely contributed to the higher adolescent abortion rate in

1  
2  
3 Kinshasa. Approximately half of the unintended pregnancy among adolescents in Kinshasa ended in  
4 abortion compared to less than a fifth of such pregnancies among adolescents in Uganda<sup>20</sup> and  
5 Zimbabwe.<sup>21</sup> While the proportion of unintended pregnancies ending in abortion is higher for adolescents  
6 compared to older women in Kinshasa, the proportion did not vary systematically by age in Uganda.<sup>20</sup>  
7  
8 Unintended pregnancy in Kinshasa, as our findings show, is more likely to result in abortion among  
9 adolescents and other young people (age 15-24) than in births unlike the picture in older women. The  
10 abortion ratio of 82.4 per 100 live births for adolescents in Kinshasa, which implies that approximately  
11 four abortions occur among adolescents for every five births, is substantially higher than the ratio for  
12 older women in Kinshasa and more than double the ratio of  $\leq 31.1/100$  live births for adolescents in  
13 Ethiopia<sup>19</sup> and Zimbabwe.<sup>21</sup>  
14  
15  
16  
17  
18  
19  
20  
21  
22  
23  
24  
25  
26  
27

28 The higher rate of unintended pregnancy among adolescents in Kinshasa compared to older women may  
29 likely be explained by differential contraceptive behavior. As the 2013-14 DRC DHS reports, adolescents  
30 have the lowest rate of contraceptive use among women aged less than 45 years.<sup>25</sup> Studies have also  
31 shown that adolescents in DRC<sup>28</sup> and Kinshasa<sup>29</sup> have a higher unmet need for contraceptives. Globally,  
32 adolescents have a higher level of unmet need for contraceptives as a result of demand-side barriers  
33 (contraceptive-seeking behavior), supply-side barriers (health service factors), and structural and  
34 environmental barriers such as unsupportive social norms and policies.<sup>30,31</sup> Specifically for DRC, research  
35 findings indicate that existing family planning services have gaps and inadequacies regarding adolescents'  
36 needs<sup>32</sup> and that cultural perspectives and social norms against premarital and adolescent sexual  
37 engagement are deeply rooted.<sup>33</sup> The strong social stigma associated with pre-marital or out-of-union  
38 pregnancy is likely to have also contributed significantly to the high adolescent abortion ratio in Kinshasa.  
39  
40  
41  
42  
43  
44  
45  
46  
47  
48  
49  
50  
51  
52  
53  
54  
55  
56  
57  
58  
59  
60

As a qualitative study reported, young people in Kinshasa have concerns that pre-marital pregnancy would

1  
2  
3 bring dishonor to their families and may, therefore, seek abortion clandestinely in case of unintended  
4 pregnancy.<sup>34</sup>  
5  
6  
7  
8  
9

10 It is important to emphasize that our findings relate to only Kinshasa – the national capital of DRC and a  
11 highly urbanized area, and not the entire country. The abortion estimates for DRC as a whole would likely  
12 have been much lower as most other parts of the country outside Kinshasa are far less urbanized and  
13 abortion rates are generally higher in urban settings.<sup>18</sup> Our focus on Kinshasa alone also likely explains the  
14 higher abortion estimates we obtained compared to the figures for adolescents in more nationally-  
15 oriented studies in Ethiopia,<sup>19</sup> Uganda,<sup>20</sup> and Zimbabwe.<sup>21</sup>  
16  
17  
18  
19  
20  
21  
22  
23  
24

25 Regarding abortion-related care experiences, our findings show that adolescent PAC clients have less  
26 desired abortion care experiences compared to older women in terms of seeking an abortion later than  
27 the first trimester and from non-medical professionals and are less likely to use contraceptives before  
28 pregnancy or receive post-abortion contraceptives. Although several authors have reported that  
29 adolescents may face more barriers to SRH care<sup>30,31</sup> and receive a lower quality of maternal health  
30 services,<sup>35</sup> the findings concerning PAC varied.<sup>20,21</sup> For example, while Riley et al.<sup>21</sup> reported that  
31 adolescent PAC patients are 21% more likely to experience a delay in reaching care in Zimbabwe compared  
32 to older women, Sully et al.<sup>20</sup> recorded no significant difference between adolescents and older women  
33 in this respect in Uganda. The Ugandan study also found no significant difference between adolescents  
34 and older women concerning the experience of unintended pregnancy, the gestational age of seeking an  
35 abortion, the use of non-medical professionals for abortion services, or in receiving post-abortion  
36 contraceptive services.<sup>20</sup>  
37  
38  
39  
40  
41  
42  
43  
44  
45  
46  
47  
48  
49  
50  
51  
52  
53  
54  
55  
56  
57  
58  
59  
60

1  
2  
3 This study has some limitations. First, in the absence of an age-specific multiplier, we used a uniform  
4 multiplier in estimating abortions by age groups: this may bias the estimate for specific age groups as  
5 the possibility of the occurrence of a complication and access to treatment may vary by age. Specifically,  
6 if the multiplier — “the number of women without complications or with untreated complications for  
7 every woman with a treated complication”<sup>19</sup>— is higher for adolescents than for older ages our abortion  
8 rate for adolescents would be an underestimate. While no significant difference was recorded in the  
9 time taken by adolescents and older women to reach PAC in this study, a higher proportion of  
10 adolescents compared to older women experienced moderate/severe complications. Secondly, our  
11 findings regarding care-seeking experiences may not be generalizable to all abortion experiences as PAC  
12 caseload consists of both miscarriages and induced abortion cases, and the care-seeking behaviors may  
13 differ for the two groups. Also, women who had abortions but did not experience complications, those  
14 who failed to seek facility care for abortion complications or those who died from abortion  
15 complications are excluded from the PAC caseloads. Thus, our findings cannot be generalized for  
16 induced abortion complications. Thirdly, self-reported information from PAC patients may be liable to  
17 social desirability and other forms of response bias. The findings that adolescents are less likely to report  
18 their pregnancy as being intended and more likely to report the index pregnancy as induced may  
19 indicate a low level of social desirability bias, if at all.

20  
21  
22  
23  
24  
25  
26  
27  
28  
29  
30  
31  
32  
33  
34  
35  
36  
37  
38  
39  
40  
41  
42  
43 Our findings imply the need to prioritize adolescent SRH issues in Kinshasa. While Congo DRC has several  
44 policies and programs with relevant focus on adolescent SRH issues, including the National Multisectoral  
45 Plan on Family Planning (2014 – 2020) and school-based sexuality education program (Family Life  
46 Education) program, the country faces formidable challenges in terms of implementation, resulting in sub-  
47 optimal effectiveness,<sup>36,37</sup> Thus, the country needs to strengthen the implementation of policies and  
48 programs to enable adolescents to overcome various barriers to accessing modern contraceptives and  
49

1  
2  
3 thereby reduce unintended pregnancy and the associated abortion. Among others, efforts should be  
4  
5 directed towards expanding modern family planning services and improving the friendliness and  
6  
7 responsiveness of services to adolescents. Evidence-driven behavior change communications are needed  
8  
9 to improve adolescent contraceptive-seeking behavior and positively impact SRH-related social norms.  
10  
11 Also, there is a need to rigorously implement the domesticated Maputo protocol to improve access to  
12  
13 safe abortion as well as abortion-related care experiences and outcomes for adolescents as well as older  
14  
15 women. Overall, considerable efforts should be dedicated to strengthening the capacity of health and  
16  
17 related social systems to be more adolescent-responsive: meaningful involvement of adolescents and  
18  
19 adolescent-serving organizations in relevant policy and program decisions are important in this regard.  
20  
21  
22  
23  
24  
25  
26  
27  
28  
29  
30  
31  
32  
33  
34  
35  
36  
37  
38  
39  
40  
41  
42  
43  
44  
45  
46  
47  
48  
49  
50  
51  
52  
53  
54  
55  
56  
57  
58  
59  
60

1  
2  
3 **Contributors:** AOF led the conceptualisation of the research, and TR, PKK, and CM participated in the  
4 process. TR and AOF analysed the data. AOF wrote the original draft of the manuscript; TR, PKK, and CM  
5 participated in reviewing and editing the draft. PKK and CM played leadership roles in the original data  
6 collection exercise.  
7  
8

9  
10 **Acknowledgments:** The authors are grateful to Akinrinola Bankole, Alanna Galati, Sarah Keogh, Sophia  
11 Sadinsky, and Elizabeth Sully for their review of the manuscript. We are also grateful to Florby Dorme,  
12 Meg Schurr, and Madison Poore for support services.  
13

14 **Competing Interests:** The authors have no competing interests.  
15

16  
17 **Funding:** This study was made possible by the Dutch Ministry of Foreign Affairs (Activity #4000000282)  
18 and UK Aid from the UK Government (project #203177-101). The views expressed are those of the authors  
19 and do not necessarily reflect the positions and policies of the donors.  
20

21 **Patient consent for publication:** Not required.  
22

23 **Ethics approval:** We obtained ethical approval from the institutional ethics board of the Guttmacher  
24 Institute (10 November 2015, DHHS identifier IRB00002197) and from the University of Kinshasa School  
25 of Public Health Ethics Committee (27 December 2015, approval number ESP/CE/010B/2015).  
26

27 **Provenance and peer review:** Not commissioned; externally peer reviewed.  
28

29  
30 **Data availability statement:** Deidentified versions of the raw Health Facility Survey, Prospective  
31 Morbidity Survey and, Health Professional Survey Health datasets used by the authors  
32 are available from the Guttmacher Institute upon reasonable request to researchers who wish to use  
33 the data for scholarly analysis. To discuss obtaining copies of these datasets, please contact  
34 [popcenter@guttmacher.org](mailto:popcenter@guttmacher.org) with the detailed protocol for your proposed study, and information  
35 about the funding and resources you have to carry out the study.  
36  
37

38  
39 **ORCID iD:** Adesegun O. Fatusi [0000-0002-3893-8024](https://orcid.org/0000-0002-3893-8024).  
40  
41  
42  
43  
44  
45  
46  
47  
48  
49  
50  
51  
52  
53  
54  
55  
56  
57  
58  
59  
60



1  
2  
3 **Figure legends:**  
4  
5

6 Figure 1. Abortion estimates by age group in Kinshasa, DRC, for all women, ever-sexually active women,  
7 and recently sexually active women, 2016  
8

9 Legend: Abortion rate per 1,000 women; Abortion rate per 1,000 women sexually active in past 12  
10 months; Abortion rate per 1,000 women who have ever had sex  
11  
12  
13

14 Figure 2. Percentage of all pregnancies in Kinshasa, DRC, that are unintended by age group and  
15 outcome, 2016  
16

17 Legend: Unintended pregnancies that ended in abortion; Unintended pregnancies that ended in birth;  
18 Unintended pregnancies that ended in miscarriage; Percent of pregnancies that were unintended  
19  
20  
21

22 Figure 3. Adjusted odds ratios, hazard ratios and 95% confidence intervals of abortion care experiences  
23 among adolescent postabortion care patients as compared to older postabortion care patients in  
24 Kinshasa, DRC, 2016  
25  
26  
27  
28  
29  
30  
31  
32  
33  
34  
35  
36  
37  
38  
39  
40  
41  
42  
43  
44  
45  
46  
47  
48  
49  
50  
51  
52  
53  
54  
55  
56  
57  
58  
59  
60

## REFERENCES

1. Say L, Chou D, Gemmill A, et al. Global causes of maternal death: A WHO systematic analysis. *Lancet Glob Health* 2014;2:e323-33. doi:10.1016/S2214-109X(14)70227-X
2. Ganatra B, Gerdtz C, Rossier C, et al. Global, regional, and subregional classification of abortions by safety, 2010-14: estimates from a Bayesian hierarchical model. *Lancet* 2017;390:2372-2381. doi:10.1016/S0140-6736(17)31794-4
3. Lavelanet AF, Schlitt S, Johnson BR Jr, et al. Global abortion policies database: A descriptive analysis of the legal categories of lawful abortion. *BMC Int Health Hum Rights* 2018;18:44. doi:10.1186/s12914-018-0183-1
4. Président de la Cour Constitutionnelle, Circulaire Relative à La Mise En Exécution Des Dispositions de l'Article 14 Du Protocole à La Charte Africaine Des Droits de l'homme et Des Peuples Relative Aux Droits de La Femme En Afrique, Apr. 6, 2018. <http://www.leganet.cd/Legislation/JO/2018/jos.05.06.2018.o.pdf> (accessed 7 Jun 2019).
5. Chae S, Kayembe PK, Philbin J, et al. The incidence of induced abortion in Kinshasa, Democratic Republic of Congo, 2016. *PLoS ONE* 2017;12:e0184389. doi:10.1371/journal.pone.0184389
6. World Bank. Democratic Republic of Congo urbanization review: Productive and inclusive cities for an emerging Democratic Republic of Congo. Washington, DC: World Bank 2018. <https://openknowledge.worldbank.org/bitstream/handle/10986/28931/9781464812033.pdf?sequence=2> (accessed 9 Dec 2019).
7. Kwete D, Binanga A, Mukaba T, et al. Family planning in the Democratic Republic of the Congo: Encouraging momentum, formidable challenges. *Glob Health Sci Pract* 2018;6:40-54. doi:10.9745/GHSP-D-17-00346

- 1  
2  
3 8. Bankole A, Kayembe P, Chae S, et al. The severity and management of complications among  
4 postabortion patients treated in Kinshasa health facilities. *Int Perspect Sex Reprod Health*  
5  
6 2018;44:1-9. doi:10.1363/44e5618  
7  
8
- 9  
10 9. Ahmed S, Choi Y, Rimon JG, et al. Trends in contraceptive prevalence rates in sub-Saharan Africa  
11 since the 2012 London Summit on Family Planning: Results from repeated cross-sectional  
12 surveys. *Lancet Glob Health* 2019;7:e904-e911. doi: 10.1016/S2214-109X(19)30200-1  
13  
14
- 15 10. Ishoso DK, Tshefu AK, Delvaux T, et. al. Extent of induced abortions and occurrence of  
16 complications in Kinshasa, Democratic Republic of the Congo. *Reprod Health* 2019;16:49.  
17  
18 doi:10.1186/s12978-019-0727-4  
19  
20
- 21 11. Lupwana K, Clandestine and risk abortions of female adolescents by self-medication in the  
22 outskirts of Kinshasa: vulnerability factors. Paper presented at the Sixth African Population  
23 Conference, Ouagadougou, Burkina Faso: Sixth African Population Conference, 2011.  
24  
25 <https://uaps2011.princeton.edu/abstracts/110572> (accessed 9 Jul 2019).  
26  
27
- 28 12. Paluku LJ. Knowledge and attitude of schoolgirls about illegal abortions in Goma, Democratic  
29 Republic of Congo, *Afr J Prim Health Care Fam Med* 2010;2:a78. doi:10.4102/phcfm.v2i1.78  
30  
31
- 32 13. Kayembe PK, Fatuma AB, Mapatano MA, et al. Prevalence and determinants of the use of  
33 modern contraceptive methods in Kinshasa, Democratic Republic of Congo, *Contraception* 2006;  
34  
35 74:400–406. doi:10.1016/j.contraception.2006.06.006  
36  
37
- 38 14. Shah I, Ahman E. Age patterns of unsafe abortion in developing country regions. *Reprod Health*  
39  
40  
41  
42  
43  
44  
45  
46  
47  
48  
49
- 50 15. Shah IH, Ahman E. Unsafe abortion differentials in 2008 by age and developing country region:  
51 high burden among young women. *Reprod Health Matters* 2012;20:169-73. doi:10.1016/S0968-  
52  
53 8080(12)39598-0  
54  
55  
56  
57  
58  
59  
60

- 1  
2  
3 16. Liang M, Simelane S, Fortuny Fillo G, et al. The state of adolescent sexual and reproductive  
4 health. *J Adolesc Health* 2019;65(6S):S3-S15. doi:10.1016/j.jadohealth.2019.09.015  
5  
6
- 7  
8 17. Sedgh G, Finer LB, Bankole A, et al. Adolescent pregnancy, birth, and abortion rates across  
9 countries: levels and recent trends. *J Adolesc Health* 2015;56:223-30.  
10  
11 doi:10.1016/j.jadohealth.2014.09.007  
12  
13
- 14 18. Chae S, Desai S, Crowell M, et al. Characteristics of women obtaining induced abortions in  
15 selected low- and middle-income countries. *PLoS One* 2017;12:e0172976.  
16  
17 doi:10.1371/journal.pone.0172976  
18  
19
- 20 19. Sully E, Dibaba Y, Fetters T, et al. Playing it safe: Legal and clandestine abortions among  
21 adolescents in Ethiopia. *J Adolesc Health* 2018;62:729-736.  
22  
23 doi:10.1016/j.jadohealth.2017.12.015  
24  
25
- 26 20. Sully EA, Atuyambe L, Bukenya J, et al. Estimating abortion incidence among adolescents and  
27 differences in postabortion care by age: A cross-sectional study of postabortion care patients in  
28 Uganda. *Contraception* 2018;98:510-516. doi:10.1016/j.contraception.2018.07.135  
29  
30
- 31 21. Riley T, Madziyire G, Chipato T, et al. Estimating adolescent abortion incidence and unintended  
32 pregnancy in Zimbabwe, 2016: A cross-sectional study. *BMJ Open* 2020;10:e034736.  
33  
34 doi:10.1136/bmjopen-2019-034736  
35  
36
- 37 22. Coast E, Norris AH, Moore AM, et al. Trajectories of women's abortion-related care: A  
38 conceptual framework. *Soc Sci Med* 2018;200:199-210. doi:10.1016/j.socscimed.2018.01.035  
39  
40
- 41 23. Singh S, Juarez F, Prada E, et al. Estimating abortion incidence: Assessment of a widely used  
42 indirect method. *Popul Res Policy Rev* 2019;38:429-458. doi:10.1007/s11113-019-09517-2  
43  
44
- 45 24. Harlap S, Shiono P, Ramcharan S. A life table of spontaneous abortions and the effects of age,  
46 parity and other variables. In: Porter I, Hook E, eds. *Human Embryonic and Fetal Death*. New  
47  
48  
49  
50  
51  
52  
53  
54  
55  
56  
57  
58  
59  
60  
York, NY: Academic Press 1980:145-158.

- 1  
2  
3 25. Ministère du Plan et Suivi de la Mise en oeuvre de la Révolution de la Modernité  
4  
5 (MPSMRM/Congo), Ministère de la Santé Publique (MSP/Congo), ICF International. Enquête  
6  
7 Démographique et de Santé en République Démocratique du Congo 2013–2014. Rockville,  
8  
9 Maryland, USA: MPSMRM, MSP, and ICF International 2014.  
10  
11  
12 26. Institut National de la Statistique (INS). Annuaire Statistique 2014. Kinshasa, DRC: INS-RD Congo  
13  
14 2015.[https://www.undp.org/content/dam/dem\\_rep\\_congo/docs/MDG/Anuaire%20Statistique](https://www.undp.org/content/dam/dem_rep_congo/docs/MDG/Anuaire%20Statistique)  
15  
16 [%20RDC%202014.pdf](https://www.undp.org/content/dam/dem_rep_congo/docs/MDG/Anuaire%20Statistique) (accessed 9 Jul 2019).  
17  
18  
19 27. Leridon H, Helzner J. Table 4.20 Complete Table of Intrauterine Mortality per 100 Ova Exposed  
20  
21 to the Risk of Fertilization. In: Leridon H. Human Fertility: The Basic Components. Chicago:  
22  
23 University of Chicago Press 1977:81.  
24  
25  
26 28. Li Z, Patton G, Sabet F, et al. Contraceptive use in adolescent girls and adult women in low- and  
27  
28 middle-income countries. *JAMA Netw Open* 2020;3:e1921437.  
29  
30 doi:10.1001/jamanetworkopen.2019.21437  
31  
32  
33 29. Performance Monitoring and Accountability 2020 (PMA2020). PMA2020/Kinshasa, DRC:  
34  
35 September-November 2017 (Round 6). Baltimore, MD: PMA2020.  
36  
37 <https://pma2020.org/sites/default/files/PMA2020-Kinshasa-DRC-R6-FP-Brief-En.pdf> (accessed 9  
38  
39 Jul 2019).  
40  
41  
42 30. Chandra-Mouli V, Parameshwar PS, Parry M, et al. A never-before opportunity to strengthen  
43  
44 investment and action on adolescent contraception, and what we must do to make full use of it.  
45  
46 *Reprod Health* 2017;14:85. doi:10.1186/s12978-017-0347-9  
47  
48  
49 31. Paul M, Chalasani S, Light B et al. Contraception for adolescents and youth: Responsive to their  
50  
51 sexual and reproductive health needs and rights. UNFPA 2019.  
52  
53 <https://www.unfpa.org/sites/default/files/resource->  
54  
55 [pdf/AY\\_Contraception\\_11Nov\\_UnfpaFonts\\_v2.pdf](https://www.unfpa.org/sites/default/files/resource-) (accessed 13 Mar 2020).  
56  
57  
58  
59  
60

- 1  
2  
3 32. Mukendi DM, Mukalenge FC, Ali MM, et al. Exploring the adequacy of family planning services to  
4 adolescents needs: Results of a cross-sectional study from two settings in the Democratic  
5 Republic of the Congo. *Health Educ Public Health* 2019;2:131-141. doi:10.31488 /heph.111  
6  
7  
8  
9  
10 33. Muanda FM, Gahungu NP, Wood F, et al. Attitudes toward sexual and reproductive health  
11 among adolescents and young people in urban and rural DR Congo. *Reprod Health* 2018;15:74.  
12  
13  
14  
15  
16  
17 34. Casey SE, Steven VJ, Deitch J, et al. "You must first save her life": community perceptions  
18 towards induced abortion and post-abortion care in North and South Kivu, Democratic Republic  
19 of the Congo. *Sex Reprod Health Matters* 2019;27:1571309.  
20  
21  
22  
23  
24  
25  
26 35. Owolabi OO, Wong KLM, Dennis ML, et. al. Comparing the use and content of antenatal care in  
27 adolescent and older first-time mothers in 13 countries of West Africa: a cross-sectional analysis  
28 of Demographic and Health Surveys. *Lancet Child Adolesc Health* 2017;1:203-212.  
29  
30  
31  
32  
33  
34  
35 36. Kwete D, Binanga A, Mukaba T, et al. Family planning in the Democratic Republic of the Congo:  
36 Encouraging momentum, formidable challenges. *Glob Health Sci Pract*. 2018;6:40-54. doi:  
37  
38  
39  
40  
41  
42 37. Mpunga D, Chenge FM, Mapatano M, et al. Assessing comprehensive sexuality education  
43 programs in the Democratic Republic of the Congo: Adolescents' and teachers' knowledge,  
44 attitudes and practices towards contraception. *Health*. 2020;12:1428-1444. doi:  
45  
46  
47  
48  
49  
50  
51  
52  
53  
54  
55  
56  
57  
58  
59  
60

**Table 1. Sociodemographic characteristics of post-abortion care patients, Kinshasa 2016**

|                                                      | Adolescents<br>(15-19)<br>N= 795            |      | Older Women<br>(20-49)<br>N= 4023 |      | All Women<br>(15-49)<br>N= 4990 |      | p-value |
|------------------------------------------------------|---------------------------------------------|------|-----------------------------------|------|---------------------------------|------|---------|
|                                                      | N                                           | %    | N                                 | %    | N                               | %    |         |
|                                                      | <b>I. Socio-demographic characteristics</b> |      |                                   |      |                                 |      |         |
| <b>Socioeconomic status</b>                          |                                             |      |                                   |      |                                 |      |         |
| Poor                                                 | 382                                         | 48.0 | 1558                              | 38.7 | 2026                            | 40.6 | <0.001  |
| Nonpoor                                              | 413                                         | 52.0 | 2465                              | 61.3 | 2965                            | 59.4 |         |
| <b>Educational level<sup>1</sup></b>                 |                                             |      |                                   |      |                                 |      |         |
| No or primary education                              | 149                                         | 18.7 | 430                               | 10.7 | 650                             | 13.1 | <0.001  |
| Post-primary education                               | 646                                         | 81.3 | 3592                              | 89.3 | 4327                            | 86.9 |         |
| <b>Marital status<sup>2</sup></b>                    |                                             |      |                                   |      |                                 |      |         |
| In union                                             | 292                                         | 37.9 | 2519                              | 62.6 | 2895                            | 58.3 | <0.001  |
| Not in union                                         | 479                                         | 62.1 | 1504                              | 37.4 | 2070                            | 41.7 |         |
| <b>II. Reproductive characteristics</b>              |                                             |      |                                   |      |                                 |      |         |
| <b>Previous pregnancies</b>                          |                                             |      |                                   |      |                                 |      |         |
| 0                                                    | 396                                         | 49.8 | 538                               | 13.4 | 971                             | 19.5 | <0.001  |
| ≥1                                                   | 399                                         | 50.2 | 3485                              | 86.6 | 4019                            | 80.5 |         |
| <b>Previous miscarriage<sup>a</sup></b>              |                                             |      |                                   |      |                                 |      |         |
| No                                                   | 593                                         | 74.7 | 2730                              | 67.9 | 3453                            | 69.2 | <0.001  |
| Yes                                                  | 202                                         | 25.3 | 1292                              | 32.1 | 1536                            | 30.8 |         |
| <b>Previous abortion<sup>a</sup></b>                 |                                             |      |                                   |      |                                 |      |         |
| No                                                   | 640                                         | 80.5 | 2893                              | 71.9 | 3653                            | 73.2 | <0.001  |
| Yes                                                  | 155                                         | 19.5 | 1129                              | 28.1 | 1336                            | 26.8 |         |
| <b>Pregnancy intention</b>                           |                                             |      |                                   |      |                                 |      |         |
| Intended                                             | 99                                          | 12.5 | 1204                              | 29.9 | 1323                            | 26.5 | <0.001  |
| Unintended/not sure                                  | 695                                         | 87.5 | 2818                              | 70.1 | 3667                            | 73.5 |         |
| <b>Pre-pregnancy contraceptive use</b>               |                                             |      |                                   |      |                                 |      |         |
| No                                                   | 664                                         | 83.5 | 2828                              | 70.3 | 3627                            | 72.7 | <0.001  |
| Yes                                                  | 131                                         | 16.5 | 1195                              | 29.7 | 1364                            | 27.3 |         |
| <b>Gestational age of index abortion<sup>3</sup></b> |                                             |      |                                   |      |                                 |      |         |
| First trimester                                      | 592                                         | 75.7 | 3156                              | 80.9 | 3916                            | 80.6 | 0.001   |
| second or third trimester                            | 190                                         | 24.3 | 746                               | 19.1 | 941                             | 19.4 |         |
| <b>Interfered with pregnancy</b>                     |                                             |      |                                   |      |                                 |      |         |
| No                                                   | 393                                         | 49.4 | 2430                              | 60.2 | 2823                            | 58.4 | <0.001  |
| Yes                                                  | 402                                         | 50.6 | 1605                              | 39.8 | 2007                            | 41.6 |         |
| <b>Source of help in pregnancy interference</b>      |                                             |      |                                   |      |                                 |      |         |
| Medical professional                                 | 148                                         | 36.8 | 730                               | 45.5 | 878                             | 43.7 | 0.002   |
| Non-medical professional                             | 254                                         | 63.2 | 875                               | 54.5 | 1129                            | 56.3 |         |
| <b>Severity of complication</b>                      |                                             |      |                                   |      |                                 |      |         |
| None/Mild                                            | 251                                         | 31.5 | 1574                              | 39.1 | 1824                            | 39.1 | <0.001  |
| Moderate/Severe                                      | 544                                         | 68.5 | 2449                              | 60.9 | 2994                            | 60.9 |         |

**Received post-abortion contraceptive**

|     |     |      |      |      |      |       |        |
|-----|-----|------|------|------|------|-------|--------|
| Yes | 72  | 9.1  | 665  | 16.5 | 752  | 15.1% | <0.001 |
| No  | 711 | 89.5 | 3344 | 83.1 | 4213 | 84.4% |        |

**Pregnancy resulting from forced sex**

|                           |     |      |      |      |      |       |        |
|---------------------------|-----|------|------|------|------|-------|--------|
| Reported experience       | 79  | 9.9  | 160  | 4.0  | 239  | 4.9%  | <0.001 |
| Did not report experience | 716 | 90.1 | 3875 | 96.0 | 4591 | 95.1% |        |

**III. Time taken to reach health facility**

|                                       |     |  |     |  |     |  |       |
|---------------------------------------|-----|--|-----|--|-----|--|-------|
| Mean number of days to reach facility | 4.0 |  | 4.4 |  | 4.2 |  | 0.214 |
|---------------------------------------|-----|--|-----|--|-----|--|-------|

---

<sup>1</sup> 1 missing respondent each from educational level, previous miscarriage, previous abortion and pregnancy intention for older women group

<sup>2</sup> 23 missing respondents from marital variable for adolescents

<sup>3</sup> 13 missing respondents for gestational age at abortion for adolescents and 120 for older women category



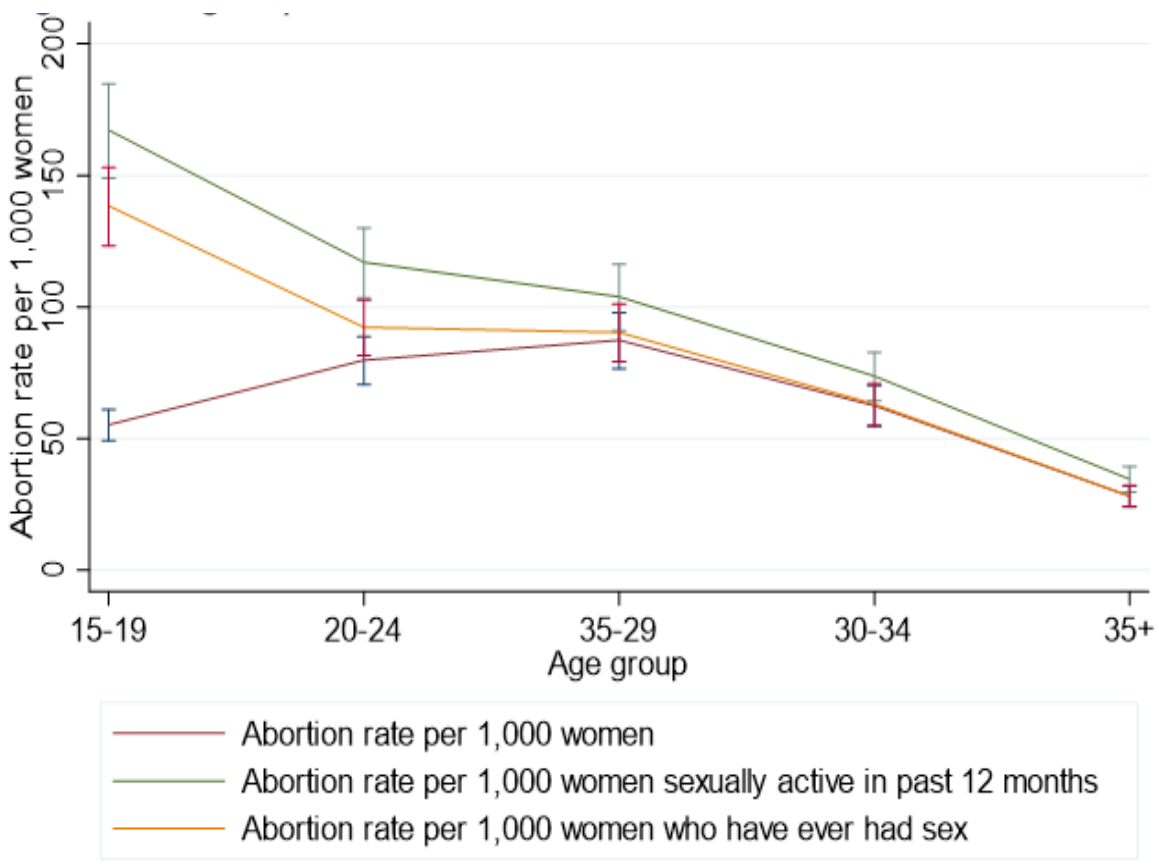

Figure 1: Abortion estimates by age group in Kinshasa, DRC, for all women, ever-sexually active women, and recently sexually active women, 2016

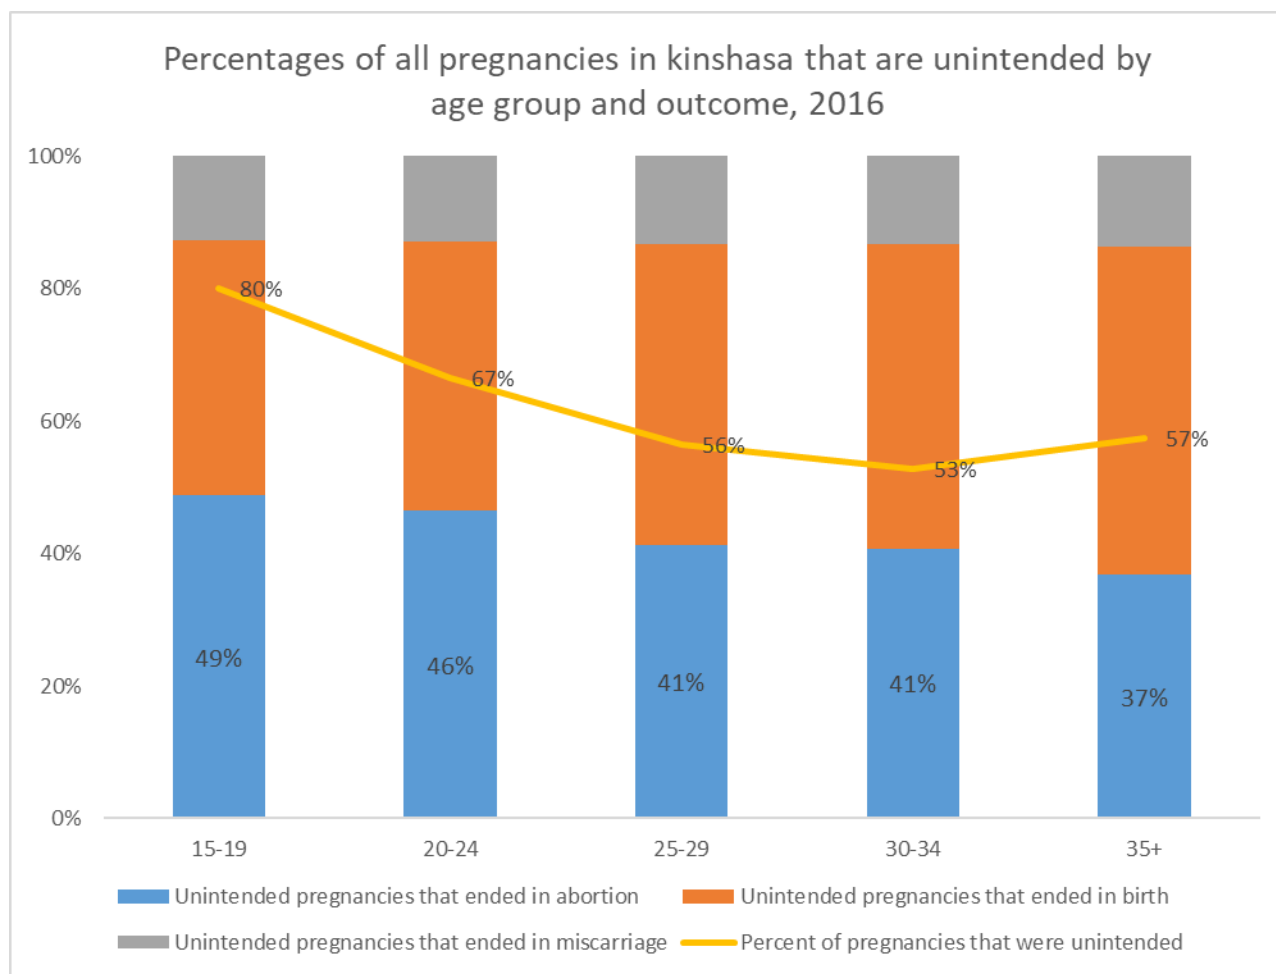

**Figure 2: Percentage of all pregnancies in Kinshasa, DRC, that are unintended by age group and outcome, 2016.**

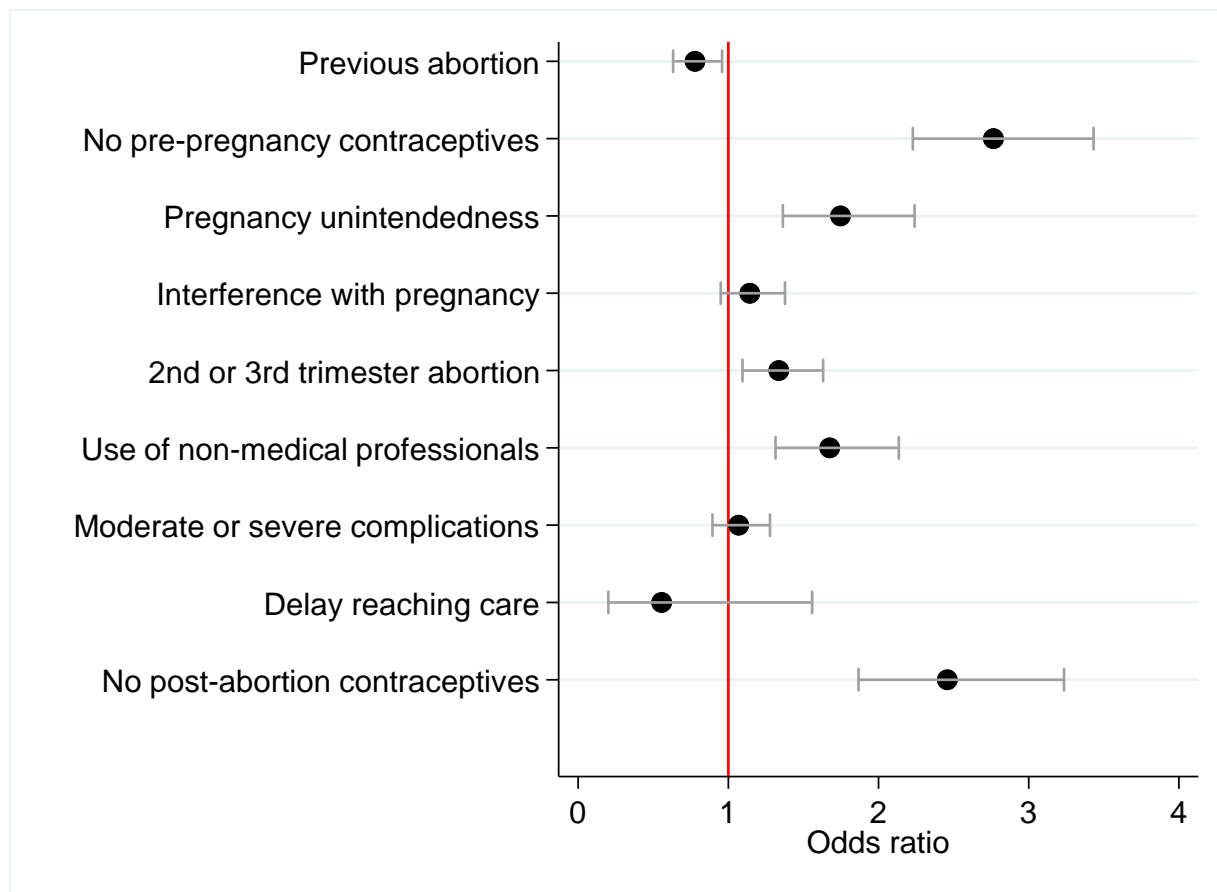

**Figure 3: Adjusted odds ratios, hazard ratios and 95% confidence intervals of abortion care experiences among adolescent postabortion care patients as compared to older postabortion care patients in Kinshasa, DRC, 2016.**

STROBE Statement—Checklist of items that should be included in reports of *cross-sectional studies*

|                           | <b>Item No</b> | <b>Page found in the manuscript</b> |
|---------------------------|----------------|-------------------------------------|
| <b>Title and abstract</b> | 1              | 1                                   |
|                           |                | 2                                   |
| <b>Introduction</b>       |                |                                     |
| Background/rationale      | 2              | 4-6                                 |
| Objectives                | 3              | 6                                   |
| <b>Methods</b>            |                |                                     |
| Study design              | 4              | 6-7                                 |
| Setting                   | 5              | 6-7                                 |
| Participants              | 6              | 6-7                                 |
| Variables                 | 7              | 7-10                                |
| Data sources/ measurement | 8*             | 7-10                                |
| Bias                      | 9              | 7                                   |
| Study size                | 10             | 7                                   |
| Quantitative variables    | 11             | 7-10                                |
| Statistical methods       | 12             | 7-10                                |
|                           |                |                                     |
|                           |                |                                     |
|                           |                |                                     |
|                           |                |                                     |
| <b>Results</b>            |                |                                     |
| Participants              | 13*            | 10                                  |
|                           |                |                                     |
|                           |                |                                     |
| Descriptive data          | 14*            | 10                                  |
|                           |                |                                     |
| Outcome data              | 15*            | 11                                  |
| Main results              | 16             | 10-12                               |
|                           |                |                                     |
| Other analyses            | 17             |                                     |
| <b>Discussion</b>         |                |                                     |
| Key results               | 18             | 12-14                               |
| Limitations               | 19             | 15                                  |
| Interpretation            | 20             | 12-14                               |
| Generalisability          | 21             | 14                                  |
| <b>Other information</b>  |                |                                     |
| Funding                   | 22             | 17                                  |

\*Give information separately for exposed and unexposed groups.
